# Supplementary material
Source: publisher site journal article supplement (https://www.dovepress.com/get_supplementary_file.php?f=161379-Table-S1.xlsx)
Supplement: Supplementary file 1 [file get_supplementary_file.php]

## Sheet: foldTable
Index	TaxonID	Name	Controls Counts	AgNP Counts	AgOAC Counts	Log2Fold (AgNP/Control)	Pvalue (AgNP/Control)	Log2Fold (AgOAC/Control)	Pvalue (AgOAC/Control)
1	374840	Enterobacteria phage phiX174 sensu lato	886902	497534	602152	-0.83	0.784465	-0.56	0.878514
2	10239	Viruses	232351	172354	178335	-0.43	0.856956	-0.38	0.73566
3	186765	Lambdalikevirus	213018	762106	626627	1.84	0.00586365	1.56	0.0198681
4	1537164	Porcine stool-associated circular virus 1	89304.2	18282.2	93296.2	-2.29	0.0536427	0.06	0.429981
5	10325	Macacine herpesvirus 1	76025.9	43872.2	54967.1	-0.79	0.819546	-0.47	0.806278
6	10870	Enterobacteria phage M13	61618.5	31306	38138.8	-0.98	0.657286	-0.69	0.984505
7	674983	Pleurotus ostreatus virus 1	58672.7	30024.8	42929.1	-0.97	0.665509	-0.45	0.790426
8	1511809	Betapartitivirus	57266.7	30394.2	41969.1	-0.91	0.715667	-0.45	0.790426
9	35237	dsDNA viruses, no RNA stage	53774.5	34995.3	30060.8	-0.62	0.971854	-0.84	0.892976
10	859651	Rosellinia necatrix partitivirus 2	50815.5	30589.9	42911.7	-0.73	0.872829	-0.24	0.630301
11	10710	Enterobacteria phage lambda	47624.9	171151	140385	1.85	0.00566348	1.56	0.0198681
12	1349410	Pandoravirus salinus	32537.2	22085.8	17378.2	-0.56	0.97385	-0.9	0.844513
13	576791	Escherichia phage wV8	30606.8	25884.4	6804.33	-0.24	0.692265	-2.17	0.133703
14	10699	Siphoviridae	30407.2	106978	89631.5	1.81	0.00650299	1.56	0.0198681
15	35342	unclassified ssDNA viruses	28309.2	6511.07	30469.1	-2.12	0.082411	0.11	0.400603
16	1491393	Jingmen tick virus	22158.1	14640.1	20165.6	-0.6	0.98995	-0.14	0.559258
17	70823	Dulcamara mottle virus	19811.1	9794.33	14763.7	-1.02	0.624814	-0.42	0.76681
18	77775	Salmonella phage FelixO1	17443.6	17720.3	3971.87	0.02	0.489739	-2.13	0.144675
19	28883	Caudovirales	15275.7	48506	41132.2	1.67	0.0103932	1.43	0.0281351
20	317858	Cyprinid herpesvirus 1	14417.6	9162.3	6351.87	-0.65	0.944739	-1.18	0.628729
21	10742	Enterobacteria phage HK022	14334.5	7346.15	8833.94	-0.96	0.673773	-0.7	0.992694
22	1349409	Pandoravirus dulcis	13017.5	8649.34	5999.65	-0.59	0.999001	-1.12	0.673074
23	35278	ssRNA positive-strand viruses, no DNA stage	9550.04	5468.84	8068.81	-0.8	0.810739	-0.24	0.630301
24	39640	Cotesia congregata bracovirus	9037.21	5716.76	4500.66	-0.66	0.935713	-1.01	0.7573
25	419435	Glypta fumiferanae ichnovirus	8780.79	5535.71	4522.73	-0.67	0.926696	-0.96	0.796632
26	1323523	Hop trefoil cryptic virus 2	8355.38	4301.84	6096.21	-0.96	0.673773	-0.45	0.790426
27	265522	Hyposoter fugitivus ichnovirus	6518.21	4336.91	3493.67	-0.59	0.999001	-0.9	0.844513
28	11103	Hepatitis C virus	6475.96	3063.07	4689.18	-1.08	0.577458	-0.47	0.806278
29	857312	Brochothrix phage A9	6191.87	4095.51	2612.66	-0.6	0.98995	-1.24	0.585684
30	10401	Ictalurid herpesvirus 1	5878.63	4057.18	2989.71	-0.54	0.955766	-0.98	0.780831
31	51368	unclassified dsDNA viruses	5772.28	3928.33	2585.07	-0.56	0.97385	-1.16	0.643372
32	28304	Murid herpesvirus 2	5202.62	3323.22	2044.33	-0.65	0.944739	-1.35	0.510534
33	11012	Partitiviridae	4306.62	2585.18	3632.53	-0.74	0.863901	-0.25	0.637613
34	180230	Cyprinid herpesvirus 3	4041.47	2721.37	2208.95	-0.57	0.982898	-0.87	0.868683
35	1323525	White clover cryptic virus 2	3996.3	2297.3	3316.18	-0.8	0.810739	-0.27	0.652342
36	483537	Alternaria alternata virus 1	3575.26	2055.1	2759.8	-0.8	0.810739	-0.37	0.727938
37	12336	Clostridium phage c-st	3423.74	2132.57	2758.88	-0.68	0.917688	-0.31	0.682206
38	251749	Phaeocystis globosa virus	3329.04	2196.18	1593.71	-0.6	0.98995	-1.06	0.718586
39	1328031	Porcine stool-associated circular virus 2	2794.35	626.315	3304.22	-2.16	0.07471	0.24	0.330068
40	1328032	Porcine stool-associated circular virus 3	2779.78	549.657	2838.89	-2.34	0.0469856	0.03	0.448192
41	10685	Bacillus phage SPO1	2699.65	1500.55	2004.79	-0.85	0.767083	-0.43	0.774659
42	1198140	Felixounalikevirus	2666.14	2303.01	603.276	-0.21	0.66733	-2.14	0.141869
43	1408895	Dill cryptic virus 1	2588.93	1429.6	2058.13	-0.86	0.758435	-0.33	0.697331
44	32603	Human herpesvirus 6A	2580.19	1867.53	1771.2	-0.47	0.892711	-0.54	0.862352
45	1094892	Megavirus chiliensis	2355.82	707.866	459.814	-1.73	0.195509	-2.36	0.0901373
46	10506	Paramecium bursaria Chlorella virus 1	2205.76	1396.16	973.886	-0.66	0.935713	-1.18	0.628729
47	33706	Caviid herpesvirus 2	2138.74	1241.21	1684.76	-0.79	0.819546	-0.34	0.704939
48	35250	Gallid herpesvirus 3	2127.09	1335.81	1073.21	-0.67	0.926696	-0.99	0.772964
49	1241371	Abalone herpesvirus Victoria/AUS/2009	2121.26	1406.76	1017.11	-0.59	0.999001	-1.06	0.718586
50	12450	Saccharomyces cerevisiae killer virus M1	2045.5	1159.66	1477.84	-0.82	0.793197	-0.47	0.806278
51	479713	Primula malacoides virus China/Mar2007	2036.76	1184.94	1617.63	-0.78	0.828375	-0.33	0.697331
52	12104	Encephalomyocarditis virus	1933.32	1754.17	1297.59	-0.14	0.610596	-0.58	0.894727
53	10484	Campoletis sonorensis ichnovirus	1918.75	1089.53	1439.22	-0.82	0.793197	-0.41	0.758985
54	305676	Deerpox virus W-1170-84	1719.15	1047.12	642.82	-0.72	0.881773	-1.42	0.465479
55	12315	Tomato aspermy virus	1589.49	1127.04	1016.19	-0.5	0.919675	-0.65	0.951776
56	188141	Spring beauty latent virus	1541.41	798.389	1201.95	-0.95	0.682076	-0.36	0.720243
57	335795	unclassified Lambda-like viruses	1529.76	5366.08	4336.05	1.81	0.00650299	1.5	0.0233752
58	1208587	Streptococcus phage SPQS1	1481.68	915.007	609.713	-0.7	0.899705	-1.28	0.55777
59	1367203	Hemileuca sp. nucleopolyhedrovirus	1471.48	994.928	1037.34	-0.56	0.97385	-0.5	0.830206
60	146015	Elephantid herpesvirus 1	1382.61	931.317	719.149	-0.57	0.982898	-0.94	0.812517
61	112023	Streptococcus phage 7201	1298.11	1003.9	445.1	-0.37	0.803892	-1.54	0.393647
62	212035	Acanthamoeba polyphaga mimivirus	1250.03	451.795	444.18	-1.47	0.317546	-1.49	0.422725
63	1477406	Dickeya phage RC-2014	1234	800.835	1104.47	-0.62	0.971854	-0.16	0.573152
64	50292	Cercopithecine herpesvirus 5	1228.17	793.495	551.777	-0.63	0.96281	-1.15	0.650747
65	433357	Bidens mottle virus	1155.33	648.334	1074.13	-0.83	0.784465	-0.11	0.538729
66	54289	Vicia cryptic virus	1139.3	605.927	813.871	-0.91	0.715667	-0.49	0.822211
67	42182	Hepatitis C virus genotype 6	1132.02	534.162	908.592	-1.08	0.577458	-0.32	0.689753
68	132475	Yaba-like disease virus	1120.36	684.216	626.267	-0.71	0.890732	-0.84	0.892976
69	10335	Human herpesvirus 3	1108.71	682.586	434.064	-0.7	0.899705	-1.35	0.510534
70	62099	Anomala cuprea entomopoxvirus	1107.25	699.711	558.214	-0.66	0.935713	-0.99	0.772964
71	548681	Herpesvirales	1085.4	720.099	485.563	-0.59	0.999001	-1.16	0.643372
72	50290	Aotine herpesvirus 1	1063.54	649.965	395.44	-0.71	0.890732	-1.43	0.459228
73	1124654	Escherichia phage TL-2011b	971.759	531.715	661.212	-0.87	0.749817	-0.56	0.878514
74	633135	Streptococcus phage Abc2	949.905	1047.12	1144.02	0.14	0.408321	0.27	0.315008
75	40271	Hepatitis C virus genotype 2	941.164	468.921	757.773	-1.01	0.632867	-0.31	0.682206
76	35325	dsRNA viruses	936.793	520.298	685.123	-0.85	0.767083	-0.45	0.790426
77	1411681	Rhizoctonia solani dsRNA virus 2	904.741	541.501	622.588	-0.74	0.863901	-0.54	0.862352
78	532078	Yersinia phage Yepe2	865.404	615.713	501.197	-0.49	0.910675	-0.79	0.933677
79	10760	Enterobacteria phage T7	855.206	39280.9	1373.92	5.52	4.21e-12	0.68	0.153985
80	28871	Taterapox virus	849.378	495.833	343.021	-0.78	0.828375	-1.31	0.537268
81	46242	Spodoptera litura nucleopolyhedrovirus	843.551	516.221	377.967	-0.71	0.890732	-1.16	0.643372
82	1323524	Red clover cryptic virus 2	821.697	439.562	626.267	-0.9	0.724154	-0.39	0.743409
83	10483	Ichnovirus	820.24	564.336	427.627	-0.54	0.955766	-0.94	0.812517
84	1623304	Sfi21dtunalikevirus	812.956	1042.23	997.796	0.36	0.281741	0.3	0.300407
85	307461	Apocheima cinerarium nucleopolyhedrovirus	805.671	521.114	350.378	-0.63	0.96281	-1.2	0.61423
86	558016	Alphabaculovirus	780.904	459.135	379.806	-0.77	0.837227	-1.04	0.733992
87	227720	Yersinia phage phiA1122	760.507	476.26	325.548	-0.68	0.917688	-1.22	0.59988
88	64186	Streptococcus phage Sfi21	722.627	389	478.206	-0.89	0.732676	-0.6	0.910984
89	306323	Streptococcus phage 2972	715.343	201.432	85.5254	-1.83	0.159163	-3.06	0.015815
90	230871	Streptococcus phage C1	705.144	276.459	122.311	-1.35	0.387925	-2.53	0.0616002
91	10280	Molluscum contagiosum virus subtype 1	697.86	419.99	324.629	-0.73	0.872829	-1.1	0.688122
92	256729	Lymphocystis disease virus - isolate China	693.489	441.193	257.496	-0.65	0.944739	-1.43	0.459228
93	317878	Cyprinid herpesvirus 2	683.291	415.097	491.081	-0.72	0.881773	-0.48	0.814235
94	1323529	Dill cryptic virus 2	655.609	357.195	474.528	-0.88	0.74123	-0.47	0.806278
95	1398149	Eel picornavirus 1	646.868	393.078	464.412	-0.72	0.881773	-0.48	0.814235
96	659497	Sclerotinia sclerotiorum partitivirus S	641.04	342.516	428.547	-0.9	0.724154	-0.58	0.894727
97	686983	Avian sapelovirus	638.126	388.185	467.171	-0.72	0.881773	-0.45	0.790426
98	92521	Oryctes rhinoceros nudivirus	630.842	465.659	331.066	-0.44	0.86587	-0.93	0.820489
99	1523023	Gentian ovary ring-spot virus	608.988	431.407	465.332	-0.5	0.919675	-0.39	0.743409
100	10357	Betaherpesvirinae	607.531	376.768	274.969	-0.69	0.90869	-1.14	0.658156
101	1231387	Porcine associated stool circular virus	606.074	176.967	801.915	-1.78	0.17664	0.4	0.255036
102	208013	Agrotis ipsilon multiple nucleopolyhedrovirus	600.247	351.487	241.862	-0.77	0.837227	-1.31	0.537268
103	10662	Myoviridae	588.591	417.543	411.993	-0.5	0.919675	-0.51	0.838218
104	1173135	Enterococcus phage BC611	576.936	319.682	228.068	-0.85	0.767083	-1.34	0.517152
105	398839	Staphylococcus phage CNPH82	560.91	363.719	424.868	-0.62	0.971854	-0.4	0.751184
106	1269028	Acanthamoeba polyphaga moumouvirus	550.712	468.921	240.023	-0.23	0.683914	-1.2	0.61423
107	1474867	Aureococcus anophagefferens virus	543.427	331.914	275.888	-0.71	0.890732	-0.98	0.780831
108	687380	Torque teno midi virus 2	530.315	299.294	401.877	-0.83	0.784465	-0.4	0.751184
109	72638	Streptococcus phage Sfi19	518.66	699.711	913.19	0.43	0.247753	0.82	0.11658
110	10317	Cercopithecine herpesvirus 2	508.461	349.856	292.442	-0.54	0.955766	-0.8	0.925519
111	31508	Agrotis segetum nucleopolyhedrovirus	505.548	366.166	282.326	-0.47	0.892711	-0.84	0.892976
112	985780	unclassified Mimiviridae	489.522	245.47	293.361	-1	0.640964	-0.74	0.974552
113	1455074	Enterobacter phage PG7	482.237	397.156	263.933	-0.28	0.726032	-0.87	0.868683
114	196242	Enterobacteria phage BP-4795	466.211	439.562	451.537	-0.08	0.563746	-0.05	0.498838
115	379529	Glossina pallidipes salivary gland hypertrophy virus	435.616	252.809	278.647	-0.79	0.819546	-0.64	0.943604
116	1027232	Groundnut ringspot and Tomato chlorotic spot virus reassortant	426.875	234.053	218.871	-0.87	0.749817	-0.96	0.796632
117	262177	Orgyia pseudotsugata multiple nucleopolyhedrovirus	421.047	274.828	217.032	-0.62	0.971854	-0.96	0.796632
118	328615	Trichoplusia ni ascovirus 2c	415.219	229.975	139.783	-0.85	0.767083	-1.57	0.376796
119	11084	Tick-borne encephalitis virus	412.305	253.625	343.941	-0.7	0.899705	-0.26	0.64496
120	10397	Tupaiid herpesvirus 1	402.107	238.946	168.292	-0.75	0.854991	-1.26	0.571646
121	432587	Gryllus bimaculatus nudivirus	394.822	286.245	210.595	-0.46	0.883749	-0.91	0.836488
122	37665	Ectocarpus siliculosus virus 1	386.081	274.013	157.256	-0.49	0.910675	-1.3	0.54406
123	1506581	Crohivirus	384.624	210.403	274.049	-0.87	0.749817	-0.49	0.822211
124	28289	Cydia pomonella granulovirus	381.71	45.6688	39.544	-3.06	0.00505999	-3.27	0.00857115
125	10353	Saimiriine herpesvirus 1	378.796	249.547	187.604	-0.6	0.98995	-1.01	0.7573
126	10255	Variola virus	377.34	237.315	139.783	-0.67	0.926696	-1.43	0.459228
127	390157	Senecavirus A	375.883	187.568	289.683	-1	0.640964	-0.38	0.73566
128	28288	Hyphantria cunea nucleopolyhedrovirus	343.831	209.587	137.944	-0.71	0.890732	-1.32	0.530519
129	218667	Oyster mushroom spherical virus	340.917	235.684	310.834	-0.53	0.946732	-0.13	0.552373
130	1458851	Enterococcus phage VD13	340.917	228.344	141.623	-0.58	0.991948	-1.27	0.564687
131	134681	Cucurbit leaf crumple virus	333.632	81.5514	414.752	-2.03	0.102097	0.31	0.295642
132	1408894	Red clover cryptic virus 1	333.632	158.21	231.746	-1.08	0.577458	-0.53	0.854291
133	196894	unclassified Siphoviridae	333.632	244.654	235.425	-0.45	0.874802	-0.5	0.830206
134	233051	Hibiscus latent Fort Pierce virus	311.779	155.763	226.228	-1	0.640964	-0.46	0.798342
135	10482	Polydnaviridae	311.779	220.189	175.649	-0.5	0.919675	-0.83	0.901097
136	889813	Colobus guereza papillomavirus type 2	301.58	163.103	108.516	-0.89	0.732676	-1.47	0.4347
137	906668	Escherichia phage HK75	300.123	956.598	732.024	1.67	0.0103932	1.29	0.0401987
138	1074210	Mouse astrovirus M-52/USA/2008	292.839	185.122	239.103	-0.66	0.935713	-0.29	0.667208
139	1432856	Formica exsecta virus 1	288.468	154.948	205.997	-0.9	0.724154	-0.49	0.822211
140	12301	Broad bean mottle virus	279.727	179.413	212.434	-0.64	0.953771	-0.4	0.751184
141	563769	Stx2-converting phage 1717	278.27	239.761	203.238	-0.21	0.66733	-0.45	0.790426
142	1434319	Staphylococcus phage vB_SepS_SEP9	273.899	58.717	41.3832	-2.22	0.0642698	-2.73	0.0380381
143	10345	Suid herpesvirus 1	265.158	172.074	175.649	-0.62	0.971854	-0.59	0.90285
144	185955	Hibiscus latent Singapore virus	246.218	132.113	183.926	-0.9	0.724154	-0.42	0.76681
145	78219	Mamestra brassicae multiple nucleopolyhedrovirus	243.304	148.424	97.4805	-0.71	0.890732	-1.32	0.530519
146	1147145	Enterobacteria phage HK446	243.304	695.634	609.713	1.52	0.0167429	1.33	0.0363708
147	1623302	Sap6likevirus	241.847	159.841	83.6861	-0.6	0.98995	-1.53	0.399363
148	11612	Impatiens necrotic spot virus	241.847	170.442	140.703	-0.5	0.919675	-0.78	0.941842
149	246343	Turkey astrovirus 2	237.476	117.434	162.774	-1.02	0.624814	-0.54	0.862352
150	1090133	Enterobacteria phage IME10	233.106	168.811	124.15	-0.47	0.892711	-0.91	0.836488
151	32604	Human herpesvirus 6B	233.106	132.929	148.06	-0.81	0.801955	-0.65	0.951776
152	399185	Staphylococcus phage PH15	228.735	149.239	189.443	-0.62	0.971854	-0.27	0.652342
153	92652	Shrimp white spot syndrome virus	224.364	150.87	115.873	-0.57	0.982898	-0.95	0.804565
154	10442	Baculoviridae	224.364	125.589	75.4095	-0.84	0.77576	-1.57	0.376796
155	1301279	Invertebrate iridovirus 22	219.993	142.715	99.3198	-0.62	0.971854	-1.15	0.650747
156	28321	Amsacta moorei entomopoxvirus 'L'	215.623	162.287	161.854	-0.41	0.839184	-0.41	0.758985
157	692606	Cyprinivirus	211.252	194.092	120.471	-0.12	0.594788	-0.81	0.91737
158	85154	Streptococcus phage O1205	205.424	424.883	920.547	1.05	0.0630067	2.16	0.00323296
159	1439369	Carp picornavirus 1	205.424	141.899	169.212	-0.53	0.946732	-0.28	0.659758
160	10842	Microvirus	203.967	98.6772	125.069	-1.05	0.600925	-0.71	0.999117
161	10665	Enterobacteria phage T4	202.51	170.442	56.0973	-0.25	0.700652	-1.85	0.241515
162	112229	Pepino mosaic virus	201.054	113.356	160.935	-0.83	0.784465	-0.32	0.689753
163	1147148	Enterobacteria phage HK629	198.14	527.638	393.601	1.41	0.0233583	0.99	0.0811975
164	382359	Synechococcus phage syn9	193.769	39.9602	20.2318	-2.28	0.0550645	-3.26	0.00883334
165	37554	Enterobacteria phage HK97	189.398	533.346	469.01	1.49	0.0183601	1.31	0.0382441
166	414528	Chilli ringspot virus	179.2	96.2307	113.114	-0.9	0.724154	-0.66	0.959953
167	181083	Chlorovirus	179.2	116.619	73.5702	-0.62	0.971854	-1.28	0.55777
168	298338	Lactobacillus phage LP65	177.743	75.8428	64.3739	-1.23	0.467067	-1.47	0.4347
169	90410	Streptococcus phage DT1	171.915	229.975	327.387	0.42	0.252425	0.93	0.0925309
170	10761	Shigella phage Sf6	169.002	192.461	136.105	0.19	0.376928	-0.31	0.682206
171	764348	Magnaporthe oryzae chrysovirus 1	167.545	101.939	105.757	-0.72	0.881773	-0.66	0.959953
172	414970	Enterobacteria phage cdtI	167.545	247.101	203.238	0.56	0.192474	0.28	0.31009
173	51677	Xestia c-nigrum granulovirus	157.346	63.6101	22.9907	-1.31	0.413351	-2.77	0.0343874
174	490711	Orgyia leucostigma NPV	154.432	117.434	91.9628	-0.4	0.830327	-0.75	0.966368
175	1197953	Staphylococcus phage Ipla7	154.432	89.7066	114.034	-0.78	0.828375	-0.44	0.782531
176	1535248	Ball python nidovirus	152.976	102.755	66.2132	-0.57	0.982898	-1.21	0.607036
177	1147149	Enterobacteria phage mEp043 c-1	152.976	118.25	120.471	-0.37	0.803892	-0.34	0.704939
178	1032362	Clostridium phage phiCD38-2	150.062	128.851	76.3291	-0.22	0.675602	-0.98	0.780831
179	1147152	Enterobacteria phage mEp460	145.691	353.118	317.272	1.28	0.0340016	1.12	0.060489
180	693272	Cafeteria roenbergensis virus BV-PW1	142.777	100.308	54.258	-0.51	0.928685	-1.4	0.478122
181	320432	Chrysodeixis chalcites nucleopolyhedrovirus	141.32	94.5997	50.5795	-0.58	0.991948	-1.48	0.428688
182	130556	Culex nigripalpus nucleopolyhedrovirus	138.406	102.755	74.4899	-0.43	0.856956	-0.89	0.852555
183	379329	Stx2-converting phage 86	136.95	243.023	206.916	0.83	0.10749	0.6	0.179116
184	196896	unclassified Myoviridae	134.036	167.18	87.3646	0.32	0.302522	-0.62	0.927279
185	73422	Streptococcus phage TP-J34	131.122	79.9204	39.544	-0.71	0.890732	-1.73	0.29462
186	46021	Paramecium bursaria Chlorella virus NY2A	129.665	83.998	51.4992	-0.63	0.96281	-1.33	0.523814
187	1016879	Cutthroat trout virus	129.665	99.4927	100.239	-0.38	0.81268	-0.37	0.727938
188	1623303	Sfi1unalikevirus	123.837	41.5912	34.9459	-1.57	0.265729	-1.83	0.249864
189	10493	Frog virus 3	123.837	98.6772	79.088	-0.33	0.768996	-0.65	0.951776
190	434309	Saffold virus	123.837	67.6877	92.8824	-0.87	0.749817	-0.41	0.758985
191	66266	Rice grassy stunt virus	122.38	62.7946	40.4636	-0.96	0.673773	-1.6	0.360398
192	10292	Herpesviridae	120.923	79.1049	71.731	-0.61	0.980901	-0.75	0.966368
193	1147154	Enterobacteria phage mEpX2	120.923	141.084	135.185	0.22	0.358827	0.16	0.372466
194	329157	unclassified T7-like viruses	119.467	78.2894	12.8748	-0.61	0.980901	-3.21	0.0102548
195	10621	Human papillomavirus type 9	118.01	110.094	53.3384	-0.1	0.57917	-1.15	0.650747
196	380598	Paramecium bursaria Chlorella virus AR158	116.553	65.2411	50.5795	-0.84	0.77576	-1.2	0.61423
197	376852	Goatpox virus Pellor	116.553	36.6981	28.5085	-1.67	0.220052	-2.03	0.175112
198	1414739	Vibrio phage SHOU24	110.725	91.3376	89.2039	-0.28	0.726032	-0.31	0.682206
199	1307954	Maruca vitrata nucleopolyhedrovirus	109.268	71.7653	69.8917	-0.61	0.980901	-0.64	0.943604
200	1147150	Enterobacteria phage mEp235	109.268	291.139	228.068	1.41	0.0233583	1.06	0.0694274
201	1147143	Enterobacteria phage HK140	109.268	172.074	148.98	0.66	0.156561	0.45	0.234234
202	10678	Enterobacteria phage P1	109.268	70.9497	68.0525	-0.62	0.971854	-0.68	0.976318
203	190478	Clostridium phage phi3626	107.811	27.7275	23.9103	-1.96	0.11986	-2.17	0.133703
204	176652	Invertebrate iridescent virus 6	106.354	66.8722	97.4805	-0.67	0.926696	-0.13	0.552373
205	155148	Salmonella phage HK620	106.354	78.2894	34.9459	-0.44	0.86587	-1.61	0.355033
206	129726	Pseudocowpox virus	104.897	62.7946	43.2225	-0.74	0.863901	-1.28	0.55777
207	564886	Enterobacteria phage YYZ-2008	103.441	70.1342	65.2936	-0.56	0.97385	-0.66	0.959953
208	247080	Ralstonia phage p12J	103.441	78.2894	52.4188	-0.4	0.830327	-0.98	0.780831
209	150286	Anguillid herpesvirus 1	103.441	70.9497	34.9459	-0.54	0.955766	-1.57	0.376796
210	10756	Bacillus phage phi29	100.527	85.629	68.0525	-0.23	0.683914	-0.56	0.878514
211	113370	Spodoptera frugiperda ascovirus 1a	100.527	66.8722	48.7403	-0.59	0.999001	-1.04	0.733992
212	1327762	Mycobacterium phage Astraea	100.527	74.2118	80.0076	-0.44	0.86587	-0.33	0.697331
213	640897	Phytophthora infestans RNA virus 1	96.156	83.1825	96.5609	-0.21	0.66733	0.01	0.460573
214	1423347	Sclerotinia sclerotiorum hypovirus 2	96.156	59.5325	75.4095	-0.69	0.90869	-0.35	0.712576
215	325676	Nam Dinh virus	94.6991	48.9309	72.6506	-0.95	0.682076	-0.38	0.73566
216	1147043	Staphylococcus phage StB20	94.6991	44.8533	51.4992	-1.08	0.577458	-0.88	0.860611
217	487492	Mikania micrantha mosaic virus	91.7853	67.6877	69.8917	-0.44	0.86587	-0.39	0.743409
218	1235314	Megavirus lba	90.3284	65.2411	115.873	-0.47	0.892711	0.36	0.272578
219	573174	Vibrio phage henriette 12B8	90.3284	72.5808	42.3029	-0.32	0.760341	-1.09	0.695693
220	190065	Fowl aviadenovirus E	88.8715	37.5137	32.187	-1.24	0.460148	-1.47	0.4347
221	10241	Chordopoxvirinae	87.4146	97.0462	38.6244	0.15	0.401921	-1.18	0.628729
222	354260	Lactococcus phage P335 sensu lato	85.9577	104.386	216.113	0.28	0.324297	1.33	0.0363708
223	262967	Thottapalayam virus	85.9577	61.9791	61.6151	-0.47	0.892711	-0.48	0.814235
224	1197952	Staphylococcus phage Ipla5	83.0438	69.3187	68.9721	-0.26	0.709077	-0.27	0.652342
225	1206898	unclassified Twortlikevirus	81.5869	51.3774	54.258	-0.67	0.926696	-0.59	0.90285
226	663241	Enterococcus phage phiEf11	81.5869	16.3103	46.901	-2.32	0.0495599	-0.8	0.925519
227	35254	Cryptophlebia leucotreta granulovirus	80.13	40.7757	53.3384	-0.97	0.665509	-0.59	0.90285
228	107804	Sorghum chlorotic spot virus	78.6731	41.5912	48.7403	-0.92	0.707214	-0.69	0.984505
229	693996	Alphacoronavirus	78.6731	73.3963	84.6058	-0.1	0.57917	0.1	0.40638
230	138184	Alcelaphine herpesvirus 2	78.6731	54.6395	30.3477	-0.53	0.946732	-1.37	0.497433
231	169683	Pseudomonas phage phiKZ	78.6731	44.8533	56.0973	-0.81	0.801955	-0.49	0.822211
232	424716	Salmonella phage Vi II-E1	77.2162	53.0084	55.1777	-0.54	0.955766	-0.48	0.814235
233	549779	Mimiviridae	77.2162	38.3292	34.0262	-1.01	0.632867	-1.18	0.628729
234	1335230	Pseudomonas phage PaBG	77.2162	72.5808	78.1684	-0.09	0.571433	0.02	0.454359
235	139870	Lactobacillus prophage Lj965	75.7593	50.5619	130.587	-0.58	0.991948	0.79	0.123927
236	687379	Torque teno midi virus 1	75.7593	29.3585	55.1777	-1.37	0.375577	-0.46	0.798342
237	376758	Propionibacterium phage PA6	74.3024	42.4067	60.6954	-0.81	0.801955	-0.29	0.667208
238	1168549	Salmonella phage vB_SosS_Oslo	72.8455	70.1342	69.8917	-0.05	0.540989	-0.06	0.505376
239	1293539	Choristoneura rosaceana entomopoxvirus 'L'	71.3886	48.1153	59.7758	-0.57	0.982898	-0.26	0.64496
240	578234	Lactobacillus phage Lv-1	71.3886	243.023	337.503	1.77	0.00745282	2.24	0.00247169
241	1623298	Phietalikevirus	69.9317	56.2705	59.7758	-0.31	0.751717	-0.23	0.623026
242	1504288	Bovine herpesvirus 6	69.9317	43.2223	33.1066	-0.69	0.90869	-1.08	0.703295
243	1569367	Helicoverpa SNPV AC53	69.9317	35.8826	54.258	-0.96	0.673773	-0.37	0.727938
244	1124849	Pseudomonas phage OBP	68.4748	26.912	33.1066	-1.35	0.387925	-1.05	0.726275
245	1204534	Clostridium phage phiMMP02	67.0178	42.4067	40.4636	-0.66	0.935713	-0.73	0.982739
246	1407493	Shigella phage SfIV	65.5609	58.717	49.6599	-0.16	0.626588	-0.4	0.751184
247	1173764	Listeria phage LP-048	64.104	59.5325	21.1514	-0.11	0.586955	-1.6	0.360398
248	1229788	Propionibacterium phage P105	64.104	31.8051	34.9459	-1.01	0.632867	-0.88	0.860611
249	1609188	DeBrazza's monkey virus 1	62.6471	27.7275	41.3832	-1.18	0.502513	-0.6	0.910984
250	1392231	Streptococcus phage 20617	62.6471	20.3879	28.5085	-1.62	0.242133	-1.14	0.658156
251	129861	Phage Gifsy-1	62.6471	55.455	25.7496	-0.18	0.642757	-1.28	0.55777
252	432200	Enterobacteria phage HK542	61.1902	203.063	130.587	1.73	0.00852525	1.09	0.0648312
253	1206110	Lactobacillus phage phiAQ113	61.1902	79.9204	57.0169	0.39	0.266806	-0.1	0.531971
254	1367204	Choristoneura occidentalis alphabaculovirus	61.1902	57.9015	22.9907	-0.08	0.563746	-1.41	0.471777
255	1486661	Bacillus phage Megatron	59.7333	54.6395	11.0355	-0.13	0.602669	-2.44	0.0756034
256	1147042	Staphylococcus phage StB12	58.2764	32.6206	39.544	-0.84	0.77576	-0.56	0.878514
257	110456	T7likevirus	58.2764	840.795	42.3029	3.85	4.77e-07	-0.46	0.798342
258	10288	Choristoneura biennis entomopoxvirus 'L'	55.3626	56.2705	22.9907	0.02	0.489739	-1.27	0.564687
259	632112	Lactobacillus phage Lb338-1	53.9057	126.405	199.559	1.23	0.0390809	1.89	0.00764079
260	51313	Helicoverpa armigera nucleopolyhedrovirus	53.9057	34.2516	24.83	-0.65	0.944739	-1.12	0.673074
261	1087068	Aspergillus foetidus dsRNA mycovirus	53.9057	43.2223	42.3029	-0.32	0.760341	-0.35	0.712576
262	646413	Streptococcus phage 5093	53.9057	14.6793	19.3122	-1.88	0.143027	-1.48	0.428688
263	619591	Monkeypox virus Zaire-96-I-16	52.4487	34.2516	22.0711	-0.61	0.980901	-1.25	0.578645
264	12657	Equid herpesvirus 2	52.4487	44.0378	38.6244	-0.25	0.700652	-0.44	0.782531
265	1547495	Salivirus FHB	52.4487	37.5137	32.187	-0.48	0.901687	-0.7	0.992694
266	166056	Epinotia aporema granulovirus	50.9918	22.8344	17.4729	-1.16	0.51708	-1.55	0.38798
267	1033976	Bean necrotic mosaic virus	50.9918	29.3585	45.9814	-0.8	0.810739	-0.15	0.566185
268	1105381	Posavirus 2	49.5349	20.3879	28.5085	-1.28	0.433052	-0.8	0.925519
269	907191	Raspberry latent virus	49.5349	35.8826	11.0355	-0.47	0.892711	-2.17	0.133703
270	1229751	Lactococcus phage BM13	49.5349	30.174	41.3832	-0.72	0.881773	-0.26	0.64496
271	1127357	Salmonella phage SPN9CC	49.5349	119.065	81.8469	1.27	0.0349697	0.72	0.142471
272	356114	Hepatitis C virus genotype 3	48.078	43.2223	47.8206	-0.15	0.61857	-0.01	0.473142
273	333760	Human papillomavirus type 16	46.6211	33.4361	21.1514	-0.48	0.901687	-1.14	0.658156
274	186794	P22likevirus	46.6211	36.6981	46.901	-0.35	0.78639	0.01	0.460573
275	10271	Rabbit fibroma virus	46.6211	56.2705	216.113	0.27	0.329897	2.21	0.00273553
276	322019	Acanthocystis turfacea Chlorella virus 1	46.6211	23.6499	95.6413	-0.98	0.657286	1.04	0.0726377
277	1235650	Propionibacterium phage PHL071N05	46.6211	24.4654	42.3029	-0.93	0.698798	-0.14	0.559258
278	1235649	Propionibacterium phage PHL067M10	45.1642	22.0189	40.4636	-1.04	0.608843	-0.16	0.573152
279	432201	Enterobacteria phage HK544	43.7073	73.3963	60.6954	0.75	0.128806	0.47	0.22626
280	1147157	Enterobacterial phage mEp234	43.7073	80.7359	84.6058	0.89	0.093417	0.95	0.0886198
281	1234171	Sauropus leaf curl disease associated DNA beta	42.2504	18.7568	24.83	-1.17	0.509769	-0.77	0.950012
282	345922	Bacillus phage Fah	42.2504	30.9895	10.1159	-0.45	0.874802	-2.06	0.165517
283	754039	Synechococcus phage S-IOM18	42.2504	34.2516	22.0711	-0.3	0.743123	-0.94	0.812517
284	1511808	Alphapartitivirus	42.2504	17.1258	21.1514	-1.3	0.419858	-1	0.76512
285	764030	Pigeon adenovirus 1	40.7935	26.912	11.0355	-0.6	0.98995	-1.89	0.225411
286	10454	Spodoptera exigua multiple nucleopolyhedrovirus	40.7935	27.7275	14.714	-0.56	0.97385	-1.47	0.4347
287	12643	Ectromelia virus	40.7935	26.0965	13.7944	-0.64	0.953771	-1.56	0.382363
288	930275	Cotia virus SPAn232	40.7935	35.0671	23.9103	-0.22	0.675602	-0.77	0.950012
289	460926	Tomato zonate spot virus	40.7935	37.5137	27.5888	-0.12	0.594788	-0.56	0.878514
290	1074213	Mouse kobuvirus M-5/USA/2010	40.7935	25.2809	4.59814	-0.69	0.90869	-3.15	0.0122267
291	1235653	Propionibacterium phage PHL111M01	40.7935	40.7757	42.3029	0	0.50411	0.05	0.436003
292	947843	Erwinia phage ENT90	39.3366	35.8826	40.4636	-0.13	0.602669	0.04	0.442074
293	55884	Enterobacteria phage SfV	39.3366	19.5723	27.5888	-1.01	0.632867	-0.51	0.838218
294	1567486	Enterobacteria phage P88	39.3366	18.7568	13.7944	-1.07	0.585232	-1.51	0.410946
295	1147153	Enterobacteria phage mEpX1	39.3366	106.832	85.5254	1.44	0.0213603	1.12	0.060489
296	1147147	Enterobacteria phage HK633	39.3366	40.7757	32.187	0.05	0.468602	-0.29	0.667208
297	1229784	Propionibacterium phage P14.4	39.3366	19.5723	27.5888	-1.01	0.632867	-0.51	0.838218
298	12303	Cowpea chlorotic mottle virus	39.3366	28.543	34.9459	-0.46	0.883749	-0.17	0.58016
299	675063	Tymovirales	37.8796	22.8344	26.6692	-0.73	0.872829	-0.51	0.838218
300	504501	Propionibacterium phage PAD20	37.8796	26.912	22.0711	-0.49	0.910675	-0.78	0.941842
301	1235655	Propionibacterium phage PHL113M01	37.8796	13.8637	21.1514	-1.45	0.328656	-0.84	0.892976
302	139872	Lactobacillus prophage Lj928	36.4227	18.7568	76.3291	-0.96	0.673773	1.07	0.0678665
303	1198135	Twortlikevirus	36.4227	11.4172	17.4729	-1.67	0.220052	-1.06	0.718586
304	10243	Cowpox virus	36.4227	23.6499	21.1514	-0.62	0.971854	-0.78	0.941842
305	1229794	Propionibacterium phage ATCC29399B_C	36.4227	16.3103	17.4729	-1.16	0.51708	-1.06	0.718586
306	1529056	Penaeus monodon nudivirus	34.9658	13.0482	7.35702	-1.42	0.345786	-2.25	0.113702
307	151536	Lactococcus phage bIL286	34.9658	9.78617	16.5533	-1.84	0.15583	-1.08	0.703295
308	432198	Enterobacteria phage HK106	33.5089	41.5912	37.7047	0.31	0.307872	0.17	0.366989
309	984186	Cronobacter phage ENT47670	33.5089	16.3103	20.2318	-1.04	0.608843	-0.73	0.982739
310	1074325	Sclerotinia sclerotiorum hypovirus 1	33.5089	22.0189	19.3122	-0.61	0.980901	-0.8	0.925519
311	10744	Podoviridae	33.5089	20.3879	16.5533	-0.72	0.881773	-1.02	0.749505
312	1235654	Propionibacterium phage PHL112N00	33.5089	34.2516	26.6692	0.03	0.482636	-0.33	0.697331
313	1398507	Felis catus papillomavirus 4	32.052	26.912	9.19628	-0.25	0.700652	-1.8	0.262762
314	997821	Rose rosette virus	32.052	18.7568	23.9103	-0.77	0.837227	-0.42	0.76681
315	384848	Corynebacterium phage P1201	32.052	26.912	11.0355	-0.25	0.700652	-1.54	0.393647
316	1235647	Propionibacterium phage PHL060L00	32.052	25.2809	29.4281	-0.34	0.777679	-0.12	0.54553
317	35287	Rice tungro spherical virus	30.5951	20.3879	28.5085	-0.59	0.999001	-0.1	0.531971
318	1443910	Turkey stool associated circular ssDNA virus	30.5951	4.89309	42.3029	-2.64	0.0199787	0.47	0.22626
319	548682	Alloherpesviridae	30.5951	25.2809	16.5533	-0.28	0.726032	-0.89	0.852555
320	103807	Enterobacteria phage phiP27	30.5951	15.4948	22.0711	-0.98	0.657286	-0.47	0.806278
321	1229790	Propionibacterium phage P100_A	30.5951	18.7568	29.4281	-0.71	0.890732	-0.06	0.505376
322	631345	Solenopsis invicta virus 3	30.5951	14.6793	25.7496	-1.06	0.593055	-0.25	0.637613
323	749413	Deep-sea thermophilic phage D6E	30.5951	8.15514	6.43739	-1.91	0.133966	-2.25	0.113702
324	36355	Pseudaletia unipuncta granulovirus	30.5951	19.5723	10.1159	-0.64	0.953771	-1.6	0.360398
325	1261657	Murid herpesvirus 8	30.5951	22.0189	25.7496	-0.47	0.892711	-0.25	0.637613
326	280701	Pseudomonas phage F116	29.1382	9.78617	13.7944	-1.57	0.265729	-1.08	0.703295
327	166122	Human endogenous retrovirus K113	29.1382	17.1258	6.43739	-0.77	0.837227	-2.18	0.131063
328	72201	Armadillidium vulgare iridescent virus	29.1382	17.9413	19.3122	-0.7	0.899705	-0.59	0.90285
329	320834	Staphylococcus phage 69	29.1382	16.3103	13.7944	-0.84	0.77576	-1.08	0.703295
330	1204516	Aeromonas phage CC2	29.1382	93.7841	32.187	1.69	0.00973361	0.14	0.38357
331	10260	Avipoxvirus	29.1382	15.4948	10.1159	-0.91	0.715667	-1.53	0.399363
332	1229786	Propionibacterium phage P101A	29.1382	16.3103	28.5085	-0.84	0.77576	-0.03	0.485898
333	329158	unclassified P22likevirus	29.1382	49.7464	37.7047	0.77	0.123191	0.37	0.268117
334	12417	Lactobacillus phage phiadh	29.1382	87.26	192.202	1.58	0.0138794	2.72	0.000432
335	1128424	Helicoverpa zea nudivirus 2	29.1382	7.33963	5.51777	-1.99	0.111971	-2.4	0.0826116
336	1293572	Mythimna separata entomopoxvirus 'L'	27.6813	17.9413	35.8655	-0.63	0.96281	0.37	0.268117
337	1105378	Porcine astrovirus 2	27.6813	26.0965	18.3926	-0.09	0.571433	-0.59	0.90285
338	74320	Buzura suppressaria nucleopolyhedrovirus	27.6813	9.78617	16.5533	-1.5	0.301349	-0.74	0.974552
339	1229791	Propionibacterium phage P100_1	27.6813	23.6499	19.3122	-0.23	0.683914	-0.52	0.846247
340	489779	Enterobacteria phage Min27	26.2244	26.0965	14.714	-0.01	0.511378	-0.83	0.901097
341	1105379	Porcine astrovirus 4	26.2244	8.97066	13.7944	-1.55	0.275597	-0.93	0.820489
342	1367205	Choristoneura rosaceana alphabaculovirus	26.2244	10.6017	8.27665	-1.31	0.413351	-1.66	0.32897
343	10386	Gallid herpesvirus 1	26.2244	13.8637	15.6337	-0.92	0.707214	-0.75	0.966368
344	40631	Enterobacteria phage N15	26.2244	15.4948	19.3122	-0.76	0.846099	-0.44	0.782531
345	1147044	Staphylococcus phage StB27	26.2244	20.3879	25.7496	-0.36	0.795128	-0.03	0.485898
346	504553	Propionibacterium phage PAS50	26.2244	25.2809	16.5533	-0.05	0.540989	-0.66	0.959953
347	343516	Escherichia phage phiV10	24.7675	24.4654	13.7944	-0.02	0.518701	-0.84	0.892976
348	43685	Lactococcus phage r1t	24.7675	20.3879	6.43739	-0.28	0.726032	-1.94	0.206379
349	348058	Salmonella phage epsilon34	24.7675	14.6793	7.35702	-0.75	0.854991	-1.75	0.285265
350	11050	Flaviviridae	24.7675	8.15514	22.0711	-1.6	0.251388	-0.17	0.58016
351	10320	Bovine herpesvirus 1	24.7675	13.8637	7.35702	-0.84	0.77576	-1.75	0.285265
352	10240	Poxviridae	24.7675	26.912	12.8748	0.12	0.421303	-0.94	0.812517
353	1168548	Salmonella phage vB_SemP_Emek	24.7675	25.2809	19.3122	0.03	0.482636	-0.36	0.720243
354	1229792	Propionibacterium phage P1.1	24.7675	15.4948	20.2318	-0.68	0.917688	-0.29	0.667208
355	59302	Ndumu virus	23.3106	15.4948	11.9552	-0.59	0.999001	-0.96	0.796632
356	1239567	Mamastrovirus 3	23.3106	14.6793	11.0355	-0.67	0.926696	-1.08	0.703295
357	329380	unclassified T4-like viruses	23.3106	8.97066	8.27665	-1.38	0.369496	-1.49	0.422725
358	10754	Enterobacteria phage P22	23.3106	12.2327	18.3926	-0.93	0.698798	-0.34	0.704939
359	459845	Streptococcus phage 858	23.3106	24.4654	67.1328	0.07	0.454796	1.53	0.0215596
360	548687	Macavirus	23.3106	20.3879	6.43739	-0.19	0.650907	-1.86	0.237415
361	1168613	Staphylococcus phage TEM123	23.3106	8.97066	19.3122	-1.38	0.369496	-0.27	0.652342
362	1147156	Enterobacterial phage mEp213	23.3106	113.356	92.8824	2.28	0.00113616	1.99	0.00560246
363	1235646	Propionibacterium phage PHL037M02	23.3106	22.8344	37.7047	-0.03	0.526077	0.69	0.151043
364	1254425	Porcine astrovirus 3	21.8536	6.52411	16.5533	-1.74	0.191621	-0.4	0.751184
365	756282	Cellulophaga phage phiST	21.8536	28.543	87.3646	0.39	0.266806	2	0.00542839
366	11019	Alphavirus	21.8536	9.78617	3.67851	-1.16	0.51708	-2.57	0.056105
367	1755588	Sicinivirus A	21.8536	16.3103	6.43739	-0.42	0.84806	-1.76	0.280663
368	10264	Pigeonpox virus	21.8536	8.97066	9.19628	-1.28	0.433052	-1.25	0.578645
369	925986	Erwinia phage phiEa104	21.8536	30.9895	5.51777	0.5	0.216745	-1.99	0.188542
370	85655	Ranid herpesvirus 1	20.3967	21.2034	26.6692	0.06	0.46167	0.39	0.259346
371	555387	Synechococcus phage S-RSM4	20.3967	19.5723	3.67851	-0.06	0.548524	-2.47	0.0706721
372	1460070	Ralstonia phage 1 NP-2014	20.3967	8.97066	5.51777	-1.19	0.495312	-1.89	0.225411
373	35252	Alcelaphine herpesvirus 1	18.9398	8.97066	6.43739	-1.08	0.577458	-1.56	0.382363
374	1537167	Porcine stool-associated circular virus 8	18.9398	5.7086	28.5085	-1.73	0.195509	0.59	0.18246
375	644610	Nyamanini nyavirus	18.9398	8.97066	6.43739	-1.08	0.577458	-1.56	0.382363
376	509923	Beet cryptic virus 1	18.9398	13.0482	15.6337	-0.54	0.955766	-0.28	0.659758
377	1464786	Laodelphax striatella honeydew virus 1	18.9398	18.7568	11.0355	-0.01	0.511378	-0.78	0.941842
378	1007127	Staphylococcus phage Sb-1	18.9398	12.2327	10.1159	-0.63	0.96281	-0.9	0.844513
379	207830	Mamestra configurata nucleopolyhedrovirus A	18.9398	20.3879	6.43739	0.11	0.427883	-1.56	0.382363
380	129862	Phage Gifsy-2	18.9398	13.0482	7.35702	-0.54	0.955766	-1.36	0.503961
381	300879	Cassia yellow blotch virus	18.9398	16.3103	18.3926	-0.22	0.675602	-0.04	0.492345
382	1133560	unclassified I3-like viruses	17.4829	4.89309	1.83926	-1.84	0.15583	-3.25	0.00910267
383	389214	Ranid herpesvirus 2	17.4829	8.15514	11.9552	-1.1	0.562056	-0.55	0.870426
384	89471	Melon yellow spot virus	17.4829	10.6017	13.7944	-0.72	0.881773	-0.34	0.704939
385	1235656	Propionibacterium phage PHL114L00	17.4829	9.78617	14.714	-0.84	0.77576	-0.25	0.637613
386	1161939	Enterococcus phage vB_Efae230P-4	16.026	22.0189	46.901	0.46	0.234103	1.55	0.0204186
387	167634	Grapevine rootstock stem lesion associated virus	16.026	7.33963	22.9907	-1.13	0.539333	0.52	0.207176
388	307467	Euproctis pseudoconspersa nucleopolyhedrovirus	16.026	6.52411	6.43739	-1.3	0.419858	-1.32	0.530519
389	1235645	Propionibacterium phage PHL010M04	16.026	10.6017	10.1159	-0.6	0.98995	-0.66	0.959953
390	11613	Tomato spotted wilt virus	16.026	15.4948	23.9103	-0.05	0.540989	0.58	0.185851
391	1127516	Pectobacterium phage ZF40	14.5691	7.33963	6.43739	-0.99	0.649104	-1.18	0.628729
392	331278	Yersinia phage phiR1-37	14.5691	8.15514	6.43739	-0.84	0.77576	-1.18	0.628729
393	1414738	Shigella phage pSb-1	14.5691	8.15514	16.5533	-0.84	0.77576	0.18	0.361562
394	442493	Enterococcus phage phiEF24C	14.5691	NaN	3.67851	NaN	NaN	-1.99	0.188542
395	305674	Deerpox virus W-848-83	14.5691	7.33963	4.59814	-0.99	0.649104	-1.66	0.32897
396	536474	Cyanophage Syn30	14.5691	7.33963	1.83926	-0.99	0.649104	-2.99	0.0192163
397	1084719	Bacillus phage G	14.5691	8.15514	2.75888	-0.84	0.77576	-2.4	0.0826116
398	101570	Enterobacteria phage ES18	14.5691	57.9015	45.9814	1.99	0.00343938	1.66	0.0150377
399	405554	White bream virus	14.5691	8.15514	3.67851	-0.84	0.77576	-1.99	0.188542
400	1229787	Propionibacterium phage P104A	14.5691	14.6793	16.5533	0.01	0.496897	0.18	0.361562
401	79205	unclassified dsDNA phages	13.1122	6.52411	6.43739	-1.01	0.632867	-1.03	0.741735
402	1502101	Sclerotinia sclerotiorum debilitation-associated RNA virus 2	13.1122	15.4948	8.27665	0.24	0.347069	-0.66	0.959953
403	37296	Human herpesvirus 8	13.1122	8.97066	5.51777	-0.55	0.964806	-1.25	0.578645
404	1300004	Alteromonas phage vB_AmaP_AD45-P1	13.1122	5.7086	4.59814	-1.2	0.488166	-1.51	0.410946
405	694015	Beluga Whale coronavirus SW1	13.1122	4.89309	5.51777	-1.42	0.345786	-1.25	0.578645
406	213034	Sclerotinia sclerotiorum debilitation-associated RNA virus	13.1122	3.26206	12.8748	-2.01	0.106944	-0.03	0.485898
407	10242	Orthopoxvirus	13.1122	12.2327	8.27665	-0.1	0.57917	-0.66	0.959953
408	10293	Alphaherpesvirinae	13.1122	9.78617	9.19628	-0.42	0.84806	-0.51	0.838218
409	1229782	Propionibacterium phage P9.1	13.1122	9.78617	8.27665	-0.42	0.84806	-0.66	0.959953
410	12300	Bromovirus	13.1122	5.7086	24.83	-1.2	0.488166	0.92	0.0945378
411	1538101	Small begomovirus-associated satellite	11.6553	8.15514	6.43739	-0.52	0.937705	-0.86	0.876768
412	1401263	Fathead minnow picornavirus	11.6553	7.33963	3.67851	-0.67	0.926696	-1.66	0.32897
413	1535247	Saimiriine herpesvirus 4	11.6553	4.07757	1.83926	-1.52	0.290862	-2.66	0.0452207
414	10855	Spiroplasma phage 4	11.6553	0.815514	6.43739	-3.84	0.000226	-0.86	0.876768
415	1038068	PreXMRV-1	11.6553	7.33963	4.59814	-0.67	0.926696	-1.34	0.517152
416	1357713	Bacillus phage phiCM3	11.6553	0.815514	2.75888	-3.84	0.000226	-2.08	0.159344
417	284687	Amasya cherry disease associated chrysovirus	11.6553	5.7086	3.67851	-1.03	0.616806	-1.66	0.32897
418	40281	Cryphonectria hypovirus 1	11.6553	3.26206	7.35702	-1.84	0.15583	-0.66	0.959953
419	10398	Ovine herpesvirus 2	11.6553	7.33963	14.714	-0.67	0.926696	0.34	0.281651
420	439488	ssRNA viruses	11.6553	5.7086	4.59814	-1.03	0.616806	-1.34	0.517152
421	1116482	Pectobacterium phage phiTE	11.6553	6.52411	4.59814	-0.84	0.77576	-1.34	0.517152
422	1267169	Streptococcus phage phiBHN167	11.6553	1.63103	2.75888	-2.84	0.0106608	-2.08	0.159344
423	1587517	Black grass cryptic virus 2	11.6553	11.4172	16.5533	-0.03	0.526077	0.51	0.210896
424	1229789	Propionibacterium phage P100D	11.6553	12.2327	13.7944	0.07	0.454796	0.24	0.330068
425	1340830	Mycobacterium phage KayaCho	11.6553	0.815514	0.919628	-3.84	0.000226	-3.66	0.00245365
426	10679	Enterobacteria phage P2	11.6553	9.78617	0.919628	-0.25	0.700652	-3.66	0.00245365
427	630199	Grapevine Syrah virus 1	11.6553	5.7086	7.35702	-1.03	0.616806	-0.66	0.959953
428	39780	unclassified dsRNA viruses	11.6553	5.7086	7.35702	-1.03	0.616806	-0.66	0.959953
429	542960	Epsilon15likevirus	10.1984	6.52411	0.919628	-0.64	0.953771	-3.47	0.00459718
430	1307957	Clanis bilineata nucleopolyhedrovirus	10.1984	8.15514	9.19628	-0.32	0.760341	-0.15	0.566185
431	271108	Bombyx mori nucleopolyhedrovirus	10.1984	9.78617	2.75888	-0.06	0.548524	-1.89	0.225411
432	1623299	Phifllikevirus	10.1984	16.3103	32.187	0.68	0.150031	1.66	0.0150377
433	38173	unclassified ssRNA positive-strand viruses	10.1984	4.07757	3.67851	-1.32	0.406904	-1.47	0.4347
434	1293540	Adoxophyes honmai entomopoxvirus 'L'	10.1984	5.7086	7.35702	-0.84	0.77576	-0.47	0.806278
435	320844	Staphylococcus phage 71	10.1984	1.63103	8.27665	-2.64	0.0199787	-0.3	0.674691
436	1327938	Mycobacterium phage ArcherS7	10.1984	11.4172	6.43739	0.16	0.395581	-0.66	0.959953
437	1204533	Bacillus phage phiAGATE	10.1984	4.89309	0.919628	-1.06	0.593055	-3.47	0.00459718
438	10286	Betaentomopoxvirus	10.1984	1.63103	2.75888	-2.64	0.0199787	-1.89	0.225411
439	1076255	Yoka poxvirus	10.1984	6.52411	6.43739	-0.64	0.953771	-0.66	0.959953
440	1147151	Enterobacteria phage mEp237	10.1984	30.9895	22.0711	1.6	0.013026	1.11	0.0619088
441	10663	T4likevirus	10.1984	5.7086	3.67851	-0.84	0.77576	-1.47	0.4347
442	1458852	Listeria phage LP-030-3	10.1984	2.44654	1.83926	-2.06	0.0951567	-2.47	0.0706721
443	1406785	Bacillus phage Grass	10.1984	16.3103	11.0355	0.68	0.150031	0.11	0.400603
444	1406779	Acinetobacter phage Petty	10.1984	3.26206	3.67851	-1.64	0.233121	-1.47	0.4347
445	207656	Bacillus phage phiNIT1	10.1984	7.33963	8.27665	-0.47	0.892711	-0.3	0.674691
		Total	2.27832e+06	2.27826e+06	2.2784e+06

## Sheet: sorted
Index	TaxonID	Name	M14_Controls Counts	M16_AgNP Counts	M17_AgOAC Counts	Log2Fold (AgNP/Control)	Pvalue (AgNP/Control)	Log2Fold (AgOAC/Control)	Pvalue (AgOAC/Control)
440	1147151	Enterobacteria phage mEp237	10.1984	30.9895	22.0711	1.6	0.013026	1.11	0.0619088
432	1623299	Phifllikevirus	10.1984	16.3103	32.187	0.68	0.150031	1.66	0.0150377
443	1406785	Bacillus phage Grass	10.1984	16.3103	11.0355	0.68	0.150031	0.11	0.400603
436	1327938	Mycobacterium phage ArcherS7	10.1984	11.4172	6.43739	0.16	0.395581	-0.66	0.959953
431	271108	Bombyx mori nucleopolyhedrovirus	10.1984	9.78617	2.75888	-0.06	0.548524	-1.89	0.225411
430	1307957	Clanis bilineata nucleopolyhedrovirus	10.1984	8.15514	9.19628	-0.32	0.760341	-0.15	0.566185
445	207656	Bacillus phage phiNIT1	10.1984	7.33963	8.27665	-0.47	0.892711	-0.3	0.674691
429	542960	Epsilon15likevirus	10.1984	6.52411	0.919628	-0.64	0.953771	-3.47	0.00459718
439	1076255	Yoka poxvirus	10.1984	6.52411	6.43739	-0.64	0.953771	-0.66	0.959953
434	1293540	Adoxophyes honmai entomopoxvirus 'L'	10.1984	5.7086	7.35702	-0.84	0.77576	-0.47	0.806278
441	10663	T4likevirus	10.1984	5.7086	3.67851	-0.84	0.77576	-1.47	0.4347
437	1204533	Bacillus phage phiAGATE	10.1984	4.89309	0.919628	-1.06	0.593055	-3.47	0.00459718
433	38173	unclassified ssRNA positive-strand viruses	10.1984	4.07757	3.67851	-1.32	0.406904	-1.47	0.4347
444	1406779	Acinetobacter phage Petty	10.1984	3.26206	3.67851	-1.64	0.233121	-1.47	0.4347
442	1458852	Listeria phage LP-030-3	10.1984	2.44654	1.83926	-2.06	0.0951567	-2.47	0.0706721
435	320844	Staphylococcus phage 71	10.1984	1.63103	8.27665	-2.64	0.0199787	-0.3	0.674691
438	10286	Betaentomopoxvirus	10.1984	1.63103	2.75888	-2.64	0.0199787	-1.89	0.225411
424	1229789	Propionibacterium phage P100D	11.6553	12.2327	13.7944	0.07	0.454796	0.24	0.330068
423	1587517	Black grass cryptic virus 2	11.6553	11.4172	16.5533	-0.03	0.526077	0.51	0.210896
426	10679	Enterobacteria phage P2	11.6553	9.78617	0.919628	-0.25	0.700652	-3.66	0.00245365
411	1538101	Small begomovirus-associated satellite	11.6553	8.15514	6.43739	-0.52	0.937705	-0.86	0.876768
412	1401263	Fathead minnow picornavirus	11.6553	7.33963	3.67851	-0.67	0.926696	-1.66	0.32897
415	1038068	PreXMRV-1	11.6553	7.33963	4.59814	-0.67	0.926696	-1.34	0.517152
419	10398	Ovine herpesvirus 2	11.6553	7.33963	14.714	-0.67	0.926696	0.34	0.281651
421	1116482	Pectobacterium phage phiTE	11.6553	6.52411	4.59814	-0.84	0.77576	-1.34	0.517152
417	284687	Amasya cherry disease associated chrysovirus	11.6553	5.7086	3.67851	-1.03	0.616806	-1.66	0.32897
420	439488	ssRNA viruses	11.6553	5.7086	4.59814	-1.03	0.616806	-1.34	0.517152
427	630199	Grapevine Syrah virus 1	11.6553	5.7086	7.35702	-1.03	0.616806	-0.66	0.959953
428	39780	unclassified dsRNA viruses	11.6553	5.7086	7.35702	-1.03	0.616806	-0.66	0.959953
413	1535247	Saimiriine herpesvirus 4	11.6553	4.07757	1.83926	-1.52	0.290862	-2.66	0.0452207
418	40281	Cryphonectria hypovirus 1	11.6553	3.26206	7.35702	-1.84	0.15583	-0.66	0.959953
422	1267169	Streptococcus phage phiBHN167	11.6553	1.63103	2.75888	-2.84	0.0106608	-2.08	0.159344
414	10855	Spiroplasma phage 4	11.6553	0.815514	6.43739	-3.84	0.000226	-0.86	0.876768
416	1357713	Bacillus phage phiCM3	11.6553	0.815514	2.75888	-3.84	0.000226	-2.08	0.159344
425	1340830	Mycobacterium phage KayaCho	11.6553	0.815514	0.919628	-3.84	0.000226	-3.66	0.00245365
402	1502101	Sclerotinia sclerotiorum debilitation-associated RNA virus 2	13.1122	15.4948	8.27665	0.24	0.347069	-0.66	0.959953
407	10242	Orthopoxvirus	13.1122	12.2327	8.27665	-0.1	0.57917	-0.66	0.959953
408	10293	Alphaherpesvirinae	13.1122	9.78617	9.19628	-0.42	0.84806	-0.51	0.838218
409	1229782	Propionibacterium phage P9.1	13.1122	9.78617	8.27665	-0.42	0.84806	-0.66	0.959953
403	37296	Human herpesvirus 8	13.1122	8.97066	5.51777	-0.55	0.964806	-1.25	0.578645
401	79205	unclassified dsDNA phages	13.1122	6.52411	6.43739	-1.01	0.632867	-1.03	0.741735
404	1300004	Alteromonas phage vB_AmaP_AD45-P1	13.1122	5.7086	4.59814	-1.2	0.488166	-1.51	0.410946
410	12300	Bromovirus	13.1122	5.7086	24.83	-1.2	0.488166	0.92	0.0945378
405	694015	Beluga Whale coronavirus SW1	13.1122	4.89309	5.51777	-1.42	0.345786	-1.25	0.578645
406	213034	Sclerotinia sclerotiorum debilitation-associated RNA virus	13.1122	3.26206	12.8748	-2.01	0.106944	-0.03	0.485898
394	442493	Enterococcus phage phiEF24C	14.5691	NaN	3.67851	NaN	NaN	-1.99	0.188542
398	101570	Enterobacteria phage ES18	14.5691	57.9015	45.9814	1.99	0.00343938	1.66	0.0150377
400	1229787	Propionibacterium phage P104A	14.5691	14.6793	16.5533	0.01	0.496897	0.18	0.361562
392	331278	Yersinia phage phiR1-37	14.5691	8.15514	6.43739	-0.84	0.77576	-1.18	0.628729
393	1414738	Shigella phage pSb-1	14.5691	8.15514	16.5533	-0.84	0.77576	0.18	0.361562
397	1084719	Bacillus phage G	14.5691	8.15514	2.75888	-0.84	0.77576	-2.4	0.0826116
399	405554	White bream virus	14.5691	8.15514	3.67851	-0.84	0.77576	-1.99	0.188542
391	1127516	Pectobacterium phage ZF40	14.5691	7.33963	6.43739	-0.99	0.649104	-1.18	0.628729
395	305674	Deerpox virus W-848-83	14.5691	7.33963	4.59814	-0.99	0.649104	-1.66	0.32897
396	536474	Cyanophage Syn30	14.5691	7.33963	1.83926	-0.99	0.649104	-2.99	0.0192163
386	1161939	Enterococcus phage vB_Efae230P-4	16.026	22.0189	46.901	0.46	0.234103	1.55	0.0204186
390	11613	Tomato spotted wilt virus	16.026	15.4948	23.9103	-0.05	0.540989	0.58	0.185851
389	1235645	Propionibacterium phage PHL010M04	16.026	10.6017	10.1159	-0.6	0.98995	-0.66	0.959953
387	167634	Grapevine rootstock stem lesion associated virus	16.026	7.33963	22.9907	-1.13	0.539333	0.52	0.207176
388	307467	Euproctis pseudoconspersa nucleopolyhedrovirus	16.026	6.52411	6.43739	-1.3	0.419858	-1.32	0.530519
384	89471	Melon yellow spot virus	17.4829	10.6017	13.7944	-0.72	0.881773	-0.34	0.704939
385	1235656	Propionibacterium phage PHL114L00	17.4829	9.78617	14.714	-0.84	0.77576	-0.25	0.637613
383	389214	Ranid herpesvirus 2	17.4829	8.15514	11.9552	-1.1	0.562056	-0.55	0.870426
382	1133560	unclassified I3-like viruses	17.4829	4.89309	1.83926	-1.84	0.15583	-3.25	0.00910267
379	207830	Mamestra configurata nucleopolyhedrovirus A	18.9398	20.3879	6.43739	0.11	0.427883	-1.56	0.382363
377	1464786	Laodelphax striatella honeydew virus 1	18.9398	18.7568	11.0355	-0.01	0.511378	-0.78	0.941842
381	300879	Cassia yellow blotch virus	18.9398	16.3103	18.3926	-0.22	0.675602	-0.04	0.492345
376	509923	Beet cryptic virus 1	18.9398	13.0482	15.6337	-0.54	0.955766	-0.28	0.659758
380	129862	Phage Gifsy-2	18.9398	13.0482	7.35702	-0.54	0.955766	-1.36	0.503961
378	1007127	Staphylococcus phage Sb-1	18.9398	12.2327	10.1159	-0.63	0.96281	-0.9	0.844513
373	35252	Alcelaphine herpesvirus 1	18.9398	8.97066	6.43739	-1.08	0.577458	-1.56	0.382363
375	644610	Nyamanini nyavirus	18.9398	8.97066	6.43739	-1.08	0.577458	-1.56	0.382363
374	1537167	Porcine stool-associated circular virus 8	18.9398	5.7086	28.5085	-1.73	0.195509	0.59	0.18246
370	85655	Ranid herpesvirus 1	20.3967	21.2034	26.6692	0.06	0.46167	0.39	0.259346
371	555387	Synechococcus phage S-RSM4	20.3967	19.5723	3.67851	-0.06	0.548524	-2.47	0.0706721
372	1460070	Ralstonia phage 1 NP-2014	20.3967	8.97066	5.51777	-1.19	0.495312	-1.89	0.225411
369	925986	Erwinia phage phiEa104	21.8536	30.9895	5.51777	0.5	0.216745	-1.99	0.188542
365	756282	Cellulophaga phage phiST	21.8536	28.543	87.3646	0.39	0.266806	2	0.00542839
367	1755588	Sicinivirus A	21.8536	16.3103	6.43739	-0.42	0.84806	-1.76	0.280663
366	11019	Alphavirus	21.8536	9.78617	3.67851	-1.16	0.51708	-2.57	0.056105
368	10264	Pigeonpox virus	21.8536	8.97066	9.19628	-1.28	0.433052	-1.25	0.578645
364	1254425	Porcine astrovirus 3	21.8536	6.52411	16.5533	-1.74	0.191621	-0.4	0.751184
362	1147156	Enterobacterial phage mEp213	23.3106	113.356	92.8824	2.28	0.00113616	1.99	0.00560246
359	459845	Streptococcus phage 858	23.3106	24.4654	67.1328	0.07	0.454796	1.53	0.0215596
363	1235646	Propionibacterium phage PHL037M02	23.3106	22.8344	37.7047	-0.03	0.526077	0.69	0.151043
360	548687	Macavirus	23.3106	20.3879	6.43739	-0.19	0.650907	-1.86	0.237415
355	59302	Ndumu virus	23.3106	15.4948	11.9552	-0.59	0.999001	-0.96	0.796632
356	1239567	Mamastrovirus 3	23.3106	14.6793	11.0355	-0.67	0.926696	-1.08	0.703295
358	10754	Enterobacteria phage P22	23.3106	12.2327	18.3926	-0.93	0.698798	-0.34	0.704939
357	329380	unclassified T4-like viruses	23.3106	8.97066	8.27665	-1.38	0.369496	-1.49	0.422725
361	1168613	Staphylococcus phage TEM123	23.3106	8.97066	19.3122	-1.38	0.369496	-0.27	0.652342
352	10240	Poxviridae	24.7675	26.912	12.8748	0.12	0.421303	-0.94	0.812517
353	1168548	Salmonella phage vB_SemP_Emek	24.7675	25.2809	19.3122	0.03	0.482636	-0.36	0.720243
347	343516	Escherichia phage phiV10	24.7675	24.4654	13.7944	-0.02	0.518701	-0.84	0.892976
348	43685	Lactococcus phage r1t	24.7675	20.3879	6.43739	-0.28	0.726032	-1.94	0.206379
354	1229792	Propionibacterium phage P1.1	24.7675	15.4948	20.2318	-0.68	0.917688	-0.29	0.667208
349	348058	Salmonella phage epsilon34	24.7675	14.6793	7.35702	-0.75	0.854991	-1.75	0.285265
351	10320	Bovine herpesvirus 1	24.7675	13.8637	7.35702	-0.84	0.77576	-1.75	0.285265
350	11050	Flaviviridae	24.7675	8.15514	22.0711	-1.6	0.251388	-0.17	0.58016
340	489779	Enterobacteria phage Min27	26.2244	26.0965	14.714	-0.01	0.511378	-0.83	0.901097
346	504553	Propionibacterium phage PAS50	26.2244	25.2809	16.5533	-0.05	0.540989	-0.66	0.959953
345	1147044	Staphylococcus phage StB27	26.2244	20.3879	25.7496	-0.36	0.795128	-0.03	0.485898
344	40631	Enterobacteria phage N15	26.2244	15.4948	19.3122	-0.76	0.846099	-0.44	0.782531
343	10386	Gallid herpesvirus 1	26.2244	13.8637	15.6337	-0.92	0.707214	-0.75	0.966368
342	1367205	Choristoneura rosaceana alphabaculovirus	26.2244	10.6017	8.27665	-1.31	0.413351	-1.66	0.32897
341	1105379	Porcine astrovirus 4	26.2244	8.97066	13.7944	-1.55	0.275597	-0.93	0.820489
337	1105378	Porcine astrovirus 2	27.6813	26.0965	18.3926	-0.09	0.571433	-0.59	0.90285
339	1229791	Propionibacterium phage P100_1	27.6813	23.6499	19.3122	-0.23	0.683914	-0.52	0.846247
336	1293572	Mythimna separata entomopoxvirus 'L'	27.6813	17.9413	35.8655	-0.63	0.96281	0.37	0.268117
338	74320	Buzura suppressaria nucleopolyhedrovirus	27.6813	9.78617	16.5533	-1.5	0.301349	-0.74	0.974552
330	1204516	Aeromonas phage CC2	29.1382	93.7841	32.187	1.69	0.00973361	0.14	0.38357
334	12417	Lactobacillus phage phiadh	29.1382	87.26	192.202	1.58	0.0138794	2.72	0.000432
333	329158	unclassified P22likevirus	29.1382	49.7464	37.7047	0.77	0.123191	0.37	0.268117
328	72201	Armadillidium vulgare iridescent virus	29.1382	17.9413	19.3122	-0.7	0.899705	-0.59	0.90285
327	166122	Human endogenous retrovirus K113	29.1382	17.1258	6.43739	-0.77	0.837227	-2.18	0.131063
329	320834	Staphylococcus phage 69	29.1382	16.3103	13.7944	-0.84	0.77576	-1.08	0.703295
332	1229786	Propionibacterium phage P101A	29.1382	16.3103	28.5085	-0.84	0.77576	-0.03	0.485898
331	10260	Avipoxvirus	29.1382	15.4948	10.1159	-0.91	0.715667	-1.53	0.399363
326	280701	Pseudomonas phage F116	29.1382	9.78617	13.7944	-1.57	0.265729	-1.08	0.703295
335	1128424	Helicoverpa zea nudivirus 2	29.1382	7.33963	5.51777	-1.99	0.111971	-2.4	0.0826116
319	548682	Alloherpesviridae	30.5951	25.2809	16.5533	-0.28	0.726032	-0.89	0.852555
325	1261657	Murid herpesvirus 8	30.5951	22.0189	25.7496	-0.47	0.892711	-0.25	0.637613
317	35287	Rice tungro spherical virus	30.5951	20.3879	28.5085	-0.59	0.999001	-0.1	0.531971
324	36355	Pseudaletia unipuncta granulovirus	30.5951	19.5723	10.1159	-0.64	0.953771	-1.6	0.360398
321	1229790	Propionibacterium phage P100_A	30.5951	18.7568	29.4281	-0.71	0.890732	-0.06	0.505376
320	103807	Enterobacteria phage phiP27	30.5951	15.4948	22.0711	-0.98	0.657286	-0.47	0.806278
322	631345	Solenopsis invicta virus 3	30.5951	14.6793	25.7496	-1.06	0.593055	-0.25	0.637613
323	749413	Deep-sea thermophilic phage D6E	30.5951	8.15514	6.43739	-1.91	0.133966	-2.25	0.113702
318	1443910	Turkey stool associated circular ssDNA virus	30.5951	4.89309	42.3029	-2.64	0.0199787	0.47	0.22626
		Total	61.1902	13.0482	48.7403
313	1398507	Felis catus papillomavirus 4	32.052	26.912	9.19628	-0.25	0.700652	-1.8	0.262762
315	384848	Corynebacterium phage P1201	32.052	26.912	11.0355	-0.25	0.700652	-1.54	0.393647
316	1235647	Propionibacterium phage PHL060L00	32.052	25.2809	29.4281	-0.34	0.777679	-0.12	0.54553
314	997821	Rose rosette virus	32.052	18.7568	23.9103	-0.77	0.837227	-0.42	0.76681
308	432198	Enterobacteria phage HK106	33.5089	41.5912	37.7047	0.31	0.307872	0.17	0.366989
312	1235654	Propionibacterium phage PHL112N00	33.5089	34.2516	26.6692	0.03	0.482636	-0.33	0.697331
310	1074325	Sclerotinia sclerotiorum hypovirus 1	33.5089	22.0189	19.3122	-0.61	0.980901	-0.8	0.925519
311	10744	Podoviridae	33.5089	20.3879	16.5533	-0.72	0.881773	-1.02	0.749505
309	984186	Cronobacter phage ENT47670	33.5089	16.3103	20.2318	-1.04	0.608843	-0.73	0.982739
306	1529056	Penaeus monodon nudivirus	34.9658	13.0482	7.35702	-1.42	0.345786	-2.25	0.113702
307	151536	Lactococcus phage bIL286	34.9658	9.78617	16.5533	-1.84	0.15583	-1.08	0.703295
304	10243	Cowpox virus	36.4227	23.6499	21.1514	-0.62	0.971854	-0.78	0.941842
302	139872	Lactobacillus prophage Lj928	36.4227	18.7568	76.3291	-0.96	0.673773	1.07	0.0678665
305	1229794	Propionibacterium phage ATCC29399B_C	36.4227	16.3103	17.4729	-1.16	0.51708	-1.06	0.718586
303	1198135	Twortlikevirus	36.4227	11.4172	17.4729	-1.67	0.220052	-1.06	0.718586
300	504501	Propionibacterium phage PAD20	37.8796	26.912	22.0711	-0.49	0.910675	-0.78	0.941842
299	675063	Tymovirales	37.8796	22.8344	26.6692	-0.73	0.872829	-0.51	0.838218
301	1235655	Propionibacterium phage PHL113M01	37.8796	13.8637	21.1514	-1.45	0.328656	-0.84	0.892976
295	1147153	Enterobacteria phage mEpX1	39.3366	106.832	85.5254	1.44	0.0213603	1.12	0.060489
296	1147147	Enterobacteria phage HK633	39.3366	40.7757	32.187	0.05	0.468602	-0.29	0.667208
292	947843	Erwinia phage ENT90	39.3366	35.8826	40.4636	-0.13	0.602669	0.04	0.442074
298	12303	Cowpea chlorotic mottle virus	39.3366	28.543	34.9459	-0.46	0.883749	-0.17	0.58016
293	55884	Enterobacteria phage SfV	39.3366	19.5723	27.5888	-1.01	0.632867	-0.51	0.838218
297	1229784	Propionibacterium phage P14.4	39.3366	19.5723	27.5888	-1.01	0.632867	-0.51	0.838218
294	1567486	Enterobacteria phage P88	39.3366	18.7568	13.7944	-1.07	0.585232	-1.51	0.410946
291	1235653	Propionibacterium phage PHL111M01	40.7935	40.7757	42.3029	0	0.50411	0.05	0.436003
289	460926	Tomato zonate spot virus	40.7935	37.5137	27.5888	-0.12	0.594788	-0.56	0.878514
288	930275	Cotia virus SPAn232	40.7935	35.0671	23.9103	-0.22	0.675602	-0.77	0.950012
286	10454	Spodoptera exigua multiple nucleopolyhedrovirus	40.7935	27.7275	14.714	-0.56	0.97385	-1.47	0.4347
285	764030	Pigeon adenovirus 1	40.7935	26.912	11.0355	-0.6	0.98995	-1.89	0.225411
287	12643	Ectromelia virus	40.7935	26.0965	13.7944	-0.64	0.953771	-1.56	0.382363
290	1074213	Mouse kobuvirus M-5/USA/2010	40.7935	25.2809	4.59814	-0.69	0.90869	-3.15	0.0122267
283	754039	Synechococcus phage S-IOM18	42.2504	34.2516	22.0711	-0.3	0.743123	-0.94	0.812517
282	345922	Bacillus phage Fah	42.2504	30.9895	10.1159	-0.45	0.874802	-2.06	0.165517
281	1234171	Sauropus leaf curl disease associated DNA beta	42.2504	18.7568	24.83	-1.17	0.509769	-0.77	0.950012
284	1511808	Alphapartitivirus	42.2504	17.1258	21.1514	-1.3	0.419858	-1	0.76512
280	1147157	Enterobacterial phage mEp234	43.7073	80.7359	84.6058	0.89	0.093417	0.95	0.0886198
279	432201	Enterobacteria phage HK544	43.7073	73.3963	60.6954	0.75	0.128806	0.47	0.22626
278	1235649	Propionibacterium phage PHL067M10	45.1642	22.0189	40.4636	-1.04	0.608843	-0.16	0.573152
275	10271	Rabbit fibroma virus	46.6211	56.2705	216.113	0.27	0.329897	2.21	0.00273553
274	186794	P22likevirus	46.6211	36.6981	46.901	-0.35	0.78639	0.01	0.460573
273	333760	Human papillomavirus type 16	46.6211	33.4361	21.1514	-0.48	0.901687	-1.14	0.658156
277	1235650	Propionibacterium phage PHL071N05	46.6211	24.4654	42.3029	-0.93	0.698798	-0.14	0.559258
276	322019	Acanthocystis turfacea Chlorella virus 1	46.6211	23.6499	95.6413	-0.98	0.657286	1.04	0.0726377
272	356114	Hepatitis C virus genotype 3	48.078	43.2223	47.8206	-0.15	0.61857	-0.01	0.473142
271	1127357	Salmonella phage SPN9CC	49.5349	119.065	81.8469	1.27	0.0349697	0.72	0.142471
269	907191	Raspberry latent virus	49.5349	35.8826	11.0355	-0.47	0.892711	-2.17	0.133703
270	1229751	Lactococcus phage BM13	49.5349	30.174	41.3832	-0.72	0.881773	-0.26	0.64496
268	1105381	Posavirus 2	49.5349	20.3879	28.5085	-1.28	0.433052	-0.8	0.925519
267	1033976	Bean necrotic mosaic virus	50.9918	29.3585	45.9814	-0.8	0.810739	-0.15	0.566185
266	166056	Epinotia aporema granulovirus	50.9918	22.8344	17.4729	-1.16	0.51708	-1.55	0.38798
264	12657	Equid herpesvirus 2	52.4487	44.0378	38.6244	-0.25	0.700652	-0.44	0.782531
265	1547495	Salivirus FHB	52.4487	37.5137	32.187	-0.48	0.901687	-0.7	0.992694
263	619591	Monkeypox virus Zaire-96-I-16	52.4487	34.2516	22.0711	-0.61	0.980901	-1.25	0.578645
259	632112	Lactobacillus phage Lb338-1	53.9057	126.405	199.559	1.23	0.0390809	1.89	0.00764079
261	1087068	Aspergillus foetidus dsRNA mycovirus	53.9057	43.2223	42.3029	-0.32	0.760341	-0.35	0.712576
260	51313	Helicoverpa armigera nucleopolyhedrovirus	53.9057	34.2516	24.83	-0.65	0.944739	-1.12	0.673074
262	646413	Streptococcus phage 5093	53.9057	14.6793	19.3122	-1.88	0.143027	-1.48	0.428688
258	10288	Choristoneura biennis entomopoxvirus 'L'	55.3626	56.2705	22.9907	0.02	0.489739	-1.27	0.564687
257	110456	T7likevirus	58.2764	840.795	42.3029	3.85	4.77e-07	-0.46	0.798342
256	1147042	Staphylococcus phage StB12	58.2764	32.6206	39.544	-0.84	0.77576	-0.56	0.878514
255	1486661	Bacillus phage Megatron	59.7333	54.6395	11.0355	-0.13	0.602669	-2.44	0.0756034
252	432200	Enterobacteria phage HK542	61.1902	203.063	130.587	1.73	0.00852525	1.09	0.0648312
253	1206110	Lactobacillus phage phiAQ113	61.1902	79.9204	57.0169	0.39	0.266806	-0.1	0.531971
254	1367204	Choristoneura occidentalis alphabaculovirus	61.1902	57.9015	22.9907	-0.08	0.563746	-1.41	0.471777
251	129861	Phage Gifsy-1	62.6471	55.455	25.7496	-0.18	0.642757	-1.28	0.55777
249	1609188	DeBrazza's monkey virus 1	62.6471	27.7275	41.3832	-1.18	0.502513	-0.6	0.910984
250	1392231	Streptococcus phage 20617	62.6471	20.3879	28.5085	-1.62	0.242133	-1.14	0.658156
247	1173764	Listeria phage LP-048	64.104	59.5325	21.1514	-0.11	0.586955	-1.6	0.360398
248	1229788	Propionibacterium phage P105	64.104	31.8051	34.9459	-1.01	0.632867	-0.88	0.860611
246	1407493	Shigella phage SfIV	65.5609	58.717	49.6599	-0.16	0.626588	-0.4	0.751184
245	1204534	Clostridium phage phiMMP02	67.0178	42.4067	40.4636	-0.66	0.935713	-0.73	0.982739
244	1124849	Pseudomonas phage OBP	68.4748	26.912	33.1066	-1.35	0.387925	-1.05	0.726275
241	1623298	Phietalikevirus	69.9317	56.2705	59.7758	-0.31	0.751717	-0.23	0.623026
242	1504288	Bovine herpesvirus 6	69.9317	43.2223	33.1066	-0.69	0.90869	-1.08	0.703295
243	1569367	Helicoverpa SNPV AC53	69.9317	35.8826	54.258	-0.96	0.673773	-0.37	0.727938
240	578234	Lactobacillus phage Lv-1	71.3886	243.023	337.503	1.77	0.00745282	2.24	0.00247169
239	1293539	Choristoneura rosaceana entomopoxvirus 'L'	71.3886	48.1153	59.7758	-0.57	0.982898	-0.26	0.64496
238	1168549	Salmonella phage vB_SosS_Oslo	72.8455	70.1342	69.8917	-0.05	0.540989	-0.06	0.505376
237	376758	Propionibacterium phage PA6	74.3024	42.4067	60.6954	-0.81	0.801955	-0.29	0.667208
235	139870	Lactobacillus prophage Lj965	75.7593	50.5619	130.587	-0.58	0.991948	0.79	0.123927
236	687379	Torque teno midi virus 1	75.7593	29.3585	55.1777	-1.37	0.375577	-0.46	0.798342
234	1335230	Pseudomonas phage PaBG	77.2162	72.5808	78.1684	-0.09	0.571433	0.02	0.454359
232	424716	Salmonella phage Vi II-E1	77.2162	53.0084	55.1777	-0.54	0.955766	-0.48	0.814235
233	549779	Mimiviridae	77.2162	38.3292	34.0262	-1.01	0.632867	-1.18	0.628729
229	693996	Alphacoronavirus	78.6731	73.3963	84.6058	-0.1	0.57917	0.1	0.40638
230	138184	Alcelaphine herpesvirus 2	78.6731	54.6395	30.3477	-0.53	0.946732	-1.37	0.497433
231	169683	Pseudomonas phage phiKZ	78.6731	44.8533	56.0973	-0.81	0.801955	-0.49	0.822211
228	107804	Sorghum chlorotic spot virus	78.6731	41.5912	48.7403	-0.92	0.707214	-0.69	0.984505
227	35254	Cryptophlebia leucotreta granulovirus	80.13	40.7757	53.3384	-0.97	0.665509	-0.59	0.90285
225	1206898	unclassified Twortlikevirus	81.5869	51.3774	54.258	-0.67	0.926696	-0.59	0.90285
226	663241	Enterococcus phage phiEf11	81.5869	16.3103	46.901	-2.32	0.0495599	-0.8	0.925519
224	1197952	Staphylococcus phage Ipla5	83.0438	69.3187	68.9721	-0.26	0.709077	-0.27	0.652342
222	354260	Lactococcus phage P335 sensu lato	85.9577	104.386	216.113	0.28	0.324297	1.33	0.0363708
223	262967	Thottapalayam virus	85.9577	61.9791	61.6151	-0.47	0.892711	-0.48	0.814235
221	10241	Chordopoxvirinae	87.4146	97.0462	38.6244	0.15	0.401921	-1.18	0.628729
220	190065	Fowl aviadenovirus E	88.8715	37.5137	32.187	-1.24	0.460148	-1.47	0.4347
219	573174	Vibrio phage henriette 12B8	90.3284	72.5808	42.3029	-0.32	0.760341	-1.09	0.695693
218	1235314	Megavirus lba	90.3284	65.2411	115.873	-0.47	0.892711	0.36	0.272578
217	487492	Mikania micrantha mosaic virus	91.7853	67.6877	69.8917	-0.44	0.86587	-0.39	0.743409
215	325676	Nam Dinh virus	94.6991	48.9309	72.6506	-0.95	0.682076	-0.38	0.73566
216	1147043	Staphylococcus phage StB20	94.6991	44.8533	51.4992	-1.08	0.577458	-0.88	0.860611
213	640897	Phytophthora infestans RNA virus 1	96.156	83.1825	96.5609	-0.21	0.66733	0.01	0.460573
214	1423347	Sclerotinia sclerotiorum hypovirus 2	96.156	59.5325	75.4095	-0.69	0.90869	-0.35	0.712576
210	10756	Bacillus phage phi29	100.527	85.629	68.0525	-0.23	0.683914	-0.56	0.878514
212	1327762	Mycobacterium phage Astraea	100.527	74.2118	80.0076	-0.44	0.86587	-0.33	0.697331
211	113370	Spodoptera frugiperda ascovirus 1a	100.527	66.8722	48.7403	-0.59	0.999001	-1.04	0.733992
208	247080	Ralstonia phage p12J	103.441	78.2894	52.4188	-0.4	0.830327	-0.98	0.780831
209	150286	Anguillid herpesvirus 1	103.441	70.9497	34.9459	-0.54	0.955766	-1.57	0.376796
207	564886	Enterobacteria phage YYZ-2008	103.441	70.1342	65.2936	-0.56	0.97385	-0.66	0.959953
206	129726	Pseudocowpox virus	104.897	62.7946	43.2225	-0.74	0.863901	-1.28	0.55777
205	155148	Salmonella phage HK620	106.354	78.2894	34.9459	-0.44	0.86587	-1.61	0.355033
204	176652	Invertebrate iridescent virus 6	106.354	66.8722	97.4805	-0.67	0.926696	-0.13	0.552373
203	190478	Clostridium phage phi3626	107.811	27.7275	23.9103	-1.96	0.11986	-2.17	0.133703
200	1147150	Enterobacteria phage mEp235	109.268	291.139	228.068	1.41	0.0233583	1.06	0.0694274
201	1147143	Enterobacteria phage HK140	109.268	172.074	148.98	0.66	0.156561	0.45	0.234234
199	1307954	Maruca vitrata nucleopolyhedrovirus	109.268	71.7653	69.8917	-0.61	0.980901	-0.64	0.943604
202	10678	Enterobacteria phage P1	109.268	70.9497	68.0525	-0.62	0.971854	-0.68	0.976318
198	1414739	Vibrio phage SHOU24	110.725	91.3376	89.2039	-0.28	0.726032	-0.31	0.682206
196	380598	Paramecium bursaria Chlorella virus AR158	116.553	65.2411	50.5795	-0.84	0.77576	-1.2	0.61423
197	376852	Goatpox virus Pellor	116.553	36.6981	28.5085	-1.67	0.220052	-2.03	0.175112
195	10621	Human papillomavirus type 9	118.01	110.094	53.3384	-0.1	0.57917	-1.15	0.650747
194	329157	unclassified T7-like viruses	119.467	78.2894	12.8748	-0.61	0.980901	-3.21	0.0102548
193	1147154	Enterobacteria phage mEpX2	120.923	141.084	135.185	0.22	0.358827	0.16	0.372466
192	10292	Herpesviridae	120.923	79.1049	71.731	-0.61	0.980901	-0.75	0.966368
191	66266	Rice grassy stunt virus	122.38	62.7946	40.4636	-0.96	0.673773	-1.6	0.360398
189	10493	Frog virus 3	123.837	98.6772	79.088	-0.33	0.768996	-0.65	0.951776
190	434309	Saffold virus	123.837	67.6877	92.8824	-0.87	0.749817	-0.41	0.758985
188	1623303	Sfi1unalikevirus	123.837	41.5912	34.9459	-1.57	0.265729	-1.83	0.249864
187	1016879	Cutthroat trout virus	129.665	99.4927	100.239	-0.38	0.81268	-0.37	0.727938
186	46021	Paramecium bursaria Chlorella virus NY2A	129.665	83.998	51.4992	-0.63	0.96281	-1.33	0.523814
185	73422	Streptococcus phage TP-J34	131.122	79.9204	39.544	-0.71	0.890732	-1.73	0.29462
184	196896	unclassified Myoviridae	134.036	167.18	87.3646	0.32	0.302522	-0.62	0.927279
183	379329	Stx2-converting phage 86	136.95	243.023	206.916	0.83	0.10749	0.6	0.179116
182	130556	Culex nigripalpus nucleopolyhedrovirus	138.406	102.755	74.4899	-0.43	0.856956	-0.89	0.852555
181	320432	Chrysodeixis chalcites nucleopolyhedrovirus	141.32	94.5997	50.5795	-0.58	0.991948	-1.48	0.428688
180	693272	Cafeteria roenbergensis virus BV-PW1	142.777	100.308	54.258	-0.51	0.928685	-1.4	0.478122
179	1147152	Enterobacteria phage mEp460	145.691	353.118	317.272	1.28	0.0340016	1.12	0.060489
178	1032362	Clostridium phage phiCD38-2	150.062	128.851	76.3291	-0.22	0.675602	-0.98	0.780831
177	1147149	Enterobacteria phage mEp043 c-1	152.976	118.25	120.471	-0.37	0.803892	-0.34	0.704939
176	1535248	Ball python nidovirus	152.976	102.755	66.2132	-0.57	0.982898	-1.21	0.607036
174	490711	Orgyia leucostigma NPV	154.432	117.434	91.9628	-0.4	0.830327	-0.75	0.966368
175	1197953	Staphylococcus phage Ipla7	154.432	89.7066	114.034	-0.78	0.828375	-0.44	0.782531
173	51677	Xestia c-nigrum granulovirus	157.346	63.6101	22.9907	-1.31	0.413351	-2.77	0.0343874
172	414970	Enterobacteria phage cdtI	167.545	247.101	203.238	0.56	0.192474	0.28	0.31009
171	764348	Magnaporthe oryzae chrysovirus 1	167.545	101.939	105.757	-0.72	0.881773	-0.66	0.959953
170	10761	Shigella phage Sf6	169.002	192.461	136.105	0.19	0.376928	-0.31	0.682206
169	90410	Streptococcus phage DT1	171.915	229.975	327.387	0.42	0.252425	0.93	0.0925309
168	298338	Lactobacillus phage LP65	177.743	75.8428	64.3739	-1.23	0.467067	-1.47	0.4347
167	181083	Chlorovirus	179.2	116.619	73.5702	-0.62	0.971854	-1.28	0.55777
166	414528	Chilli ringspot virus	179.2	96.2307	113.114	-0.9	0.724154	-0.66	0.959953
165	37554	Enterobacteria phage HK97	189.398	533.346	469.01	1.49	0.0183601	1.31	0.0382441
164	382359	Synechococcus phage syn9	193.769	39.9602	20.2318	-2.28	0.0550645	-3.26	0.00883334
163	1147148	Enterobacteria phage HK629	198.14	527.638	393.601	1.41	0.0233583	0.99	0.0811975
162	112229	Pepino mosaic virus	201.054	113.356	160.935	-0.83	0.784465	-0.32	0.689753
161	10665	Enterobacteria phage T4	202.51	170.442	56.0973	-0.25	0.700652	-1.85	0.241515
160	10842	Microvirus	203.967	98.6772	125.069	-1.05	0.600925	-0.71	0.999117
158	85154	Streptococcus phage O1205	205.424	424.883	920.547	1.05	0.0630067	2.16	0.00323296
159	1439369	Carp picornavirus 1	205.424	141.899	169.212	-0.53	0.946732	-0.28	0.659758
157	692606	Cyprinivirus	211.252	194.092	120.471	-0.12	0.594788	-0.81	0.91737
156	28321	Amsacta moorei entomopoxvirus 'L'	215.623	162.287	161.854	-0.41	0.839184	-0.41	0.758985
155	1301279	Invertebrate iridovirus 22	219.993	142.715	99.3198	-0.62	0.971854	-1.15	0.650747
153	92652	Shrimp white spot syndrome virus	224.364	150.87	115.873	-0.57	0.982898	-0.95	0.804565
154	10442	Baculoviridae	224.364	125.589	75.4095	-0.84	0.77576	-1.57	0.376796
152	399185	Staphylococcus phage PH15	228.735	149.239	189.443	-0.62	0.971854	-0.27	0.652342
150	1090133	Enterobacteria phage IME10	233.106	168.811	124.15	-0.47	0.892711	-0.91	0.836488
151	32604	Human herpesvirus 6B	233.106	132.929	148.06	-0.81	0.801955	-0.65	0.951776
149	246343	Turkey astrovirus 2	237.476	117.434	162.774	-1.02	0.624814	-0.54	0.862352
148	11612	Impatiens necrotic spot virus	241.847	170.442	140.703	-0.5	0.919675	-0.78	0.941842
147	1623302	Sap6likevirus	241.847	159.841	83.6861	-0.6	0.98995	-1.53	0.399363
146	1147145	Enterobacteria phage HK446	243.304	695.634	609.713	1.52	0.0167429	1.33	0.0363708
145	78219	Mamestra brassicae multiple nucleopolyhedrovirus	243.304	148.424	97.4805	-0.71	0.890732	-1.32	0.530519
144	185955	Hibiscus latent Singapore virus	246.218	132.113	183.926	-0.9	0.724154	-0.42	0.76681
143	10345	Suid herpesvirus 1	265.158	172.074	175.649	-0.62	0.971854	-0.59	0.90285
142	1434319	Staphylococcus phage vB_SepS_SEP9	273.899	58.717	41.3832	-2.22	0.0642698	-2.73	0.0380381
141	563769	Stx2-converting phage 1717	278.27	239.761	203.238	-0.21	0.66733	-0.45	0.790426
140	12301	Broad bean mottle virus	279.727	179.413	212.434	-0.64	0.953771	-0.4	0.751184
139	1432856	Formica exsecta virus 1	288.468	154.948	205.997	-0.9	0.724154	-0.49	0.822211
138	1074210	Mouse astrovirus M-52/USA/2008	292.839	185.122	239.103	-0.66	0.935713	-0.29	0.667208
137	906668	Escherichia phage HK75	300.123	956.598	732.024	1.67	0.0103932	1.29	0.0401987
136	889813	Colobus guereza papillomavirus type 2	301.58	163.103	108.516	-0.89	0.732676	-1.47	0.4347
135	10482	Polydnaviridae	311.779	220.189	175.649	-0.5	0.919675	-0.83	0.901097
134	233051	Hibiscus latent Fort Pierce virus	311.779	155.763	226.228	-1	0.640964	-0.46	0.798342
133	196894	unclassified Siphoviridae	333.632	244.654	235.425	-0.45	0.874802	-0.5	0.830206
132	1408894	Red clover cryptic virus 1	333.632	158.21	231.746	-1.08	0.577458	-0.53	0.854291
131	134681	Cucurbit leaf crumple virus	333.632	81.5514	414.752	-2.03	0.102097	0.31	0.295642
129	218667	Oyster mushroom spherical virus	340.917	235.684	310.834	-0.53	0.946732	-0.13	0.552373
130	1458851	Enterococcus phage VD13	340.917	228.344	141.623	-0.58	0.991948	-1.27	0.564687
128	28288	Hyphantria cunea nucleopolyhedrovirus	343.831	209.587	137.944	-0.71	0.890732	-1.32	0.530519
127	390157	Senecavirus A	375.883	187.568	289.683	-1	0.640964	-0.38	0.73566
126	10255	Variola virus	377.34	237.315	139.783	-0.67	0.926696	-1.43	0.459228
125	10353	Saimiriine herpesvirus 1	378.796	249.547	187.604	-0.6	0.98995	-1.01	0.7573
124	28289	Cydia pomonella granulovirus	381.71	45.6688	39.544	-3.06	0.00505999	-3.27	0.00857115
123	1506581	Crohivirus	384.624	210.403	274.049	-0.87	0.749817	-0.49	0.822211
122	37665	Ectocarpus siliculosus virus 1	386.081	274.013	157.256	-0.49	0.910675	-1.3	0.54406
121	432587	Gryllus bimaculatus nudivirus	394.822	286.245	210.595	-0.46	0.883749	-0.91	0.836488
120	10397	Tupaiid herpesvirus 1	402.107	238.946	168.292	-0.75	0.854991	-1.26	0.571646
119	11084	Tick-borne encephalitis virus	412.305	253.625	343.941	-0.7	0.899705	-0.26	0.64496
118	328615	Trichoplusia ni ascovirus 2c	415.219	229.975	139.783	-0.85	0.767083	-1.57	0.376796
117	262177	Orgyia pseudotsugata multiple nucleopolyhedrovirus	421.047	274.828	217.032	-0.62	0.971854	-0.96	0.796632
116	1027232	Groundnut ringspot and Tomato chlorotic spot virus reassortant	426.875	234.053	218.871	-0.87	0.749817	-0.96	0.796632
115	379529	Glossina pallidipes salivary gland hypertrophy virus	435.616	252.809	278.647	-0.79	0.819546	-0.64	0.943604
114	196242	Enterobacteria phage BP-4795	466.211	439.562	451.537	-0.08	0.563746	-0.05	0.498838
113	1455074	Enterobacter phage PG7	482.237	397.156	263.933	-0.28	0.726032	-0.87	0.868683
112	985780	unclassified Mimiviridae	489.522	245.47	293.361	-1	0.640964	-0.74	0.974552
111	31508	Agrotis segetum nucleopolyhedrovirus	505.548	366.166	282.326	-0.47	0.892711	-0.84	0.892976
110	10317	Cercopithecine herpesvirus 2	508.461	349.856	292.442	-0.54	0.955766	-0.8	0.925519
109	72638	Streptococcus phage Sfi19	518.66	699.711	913.19	0.43	0.247753	0.82	0.11658
108	687380	Torque teno midi virus 2	530.315	299.294	401.877	-0.83	0.784465	-0.4	0.751184
107	1474867	Aureococcus anophagefferens virus	543.427	331.914	275.888	-0.71	0.890732	-0.98	0.780831
106	1269028	Acanthamoeba polyphaga moumouvirus	550.712	468.921	240.023	-0.23	0.683914	-1.2	0.61423
105	398839	Staphylococcus phage CNPH82	560.91	363.719	424.868	-0.62	0.971854	-0.4	0.751184
104	1173135	Enterococcus phage BC611	576.936	319.682	228.068	-0.85	0.767083	-1.34	0.517152
103	10662	Myoviridae	588.591	417.543	411.993	-0.5	0.919675	-0.51	0.838218
102	208013	Agrotis ipsilon multiple nucleopolyhedrovirus	600.247	351.487	241.862	-0.77	0.837227	-1.31	0.537268
101	1231387	Porcine associated stool circular virus	606.074	176.967	801.915	-1.78	0.17664	0.4	0.255036
100	10357	Betaherpesvirinae	607.531	376.768	274.969	-0.69	0.90869	-1.14	0.658156
99	1523023	Gentian ovary ring-spot virus	608.988	431.407	465.332	-0.5	0.919675	-0.39	0.743409
98	92521	Oryctes rhinoceros nudivirus	630.842	465.659	331.066	-0.44	0.86587	-0.93	0.820489
97	686983	Avian sapelovirus	638.126	388.185	467.171	-0.72	0.881773	-0.45	0.790426
96	659497	Sclerotinia sclerotiorum partitivirus S	641.04	342.516	428.547	-0.9	0.724154	-0.58	0.894727
95	1398149	Eel picornavirus 1	646.868	393.078	464.412	-0.72	0.881773	-0.48	0.814235
94	1323529	Dill cryptic virus 2	655.609	357.195	474.528	-0.88	0.74123	-0.47	0.806278
93	317878	Cyprinid herpesvirus 2	683.291	415.097	491.081	-0.72	0.881773	-0.48	0.814235
92	256729	Lymphocystis disease virus - isolate China	693.489	441.193	257.496	-0.65	0.944739	-1.43	0.459228
91	10280	Molluscum contagiosum virus subtype 1	697.86	419.99	324.629	-0.73	0.872829	-1.1	0.688122
90	230871	Streptococcus phage C1	705.144	276.459	122.311	-1.35	0.387925	-2.53	0.0616002
89	306323	Streptococcus phage 2972	715.343	201.432	85.5254	-1.83	0.159163	-3.06	0.015815
88	64186	Streptococcus phage Sfi21	722.627	389	478.206	-0.89	0.732676	-0.6	0.910984
87	227720	Yersinia phage phiA1122	760.507	476.26	325.548	-0.68	0.917688	-1.22	0.59988
86	558016	Alphabaculovirus	780.904	459.135	379.806	-0.77	0.837227	-1.04	0.733992
85	307461	Apocheima cinerarium nucleopolyhedrovirus	805.671	521.114	350.378	-0.63	0.96281	-1.2	0.61423
84	1623304	Sfi21dtunalikevirus	812.956	1042.23	997.796	0.36	0.281741	0.3	0.300407
83	10483	Ichnovirus	820.24	564.336	427.627	-0.54	0.955766	-0.94	0.812517
82	1323524	Red clover cryptic virus 2	821.697	439.562	626.267	-0.9	0.724154	-0.39	0.743409
81	46242	Spodoptera litura nucleopolyhedrovirus	843.551	516.221	377.967	-0.71	0.890732	-1.16	0.643372
80	28871	Taterapox virus	849.378	495.833	343.021	-0.78	0.828375	-1.31	0.537268
79	10760	Enterobacteria phage T7	855.206	39280.9	1373.92	5.52	4.21e-12	0.68	0.153985
78	532078	Yersinia phage Yepe2	865.404	615.713	501.197	-0.49	0.910675	-0.79	0.933677
77	1411681	Rhizoctonia solani dsRNA virus 2	904.741	541.501	622.588	-0.74	0.863901	-0.54	0.862352
76	35325	dsRNA viruses	936.793	520.298	685.123	-0.85	0.767083	-0.45	0.790426
75	40271	Hepatitis C virus genotype 2	941.164	468.921	757.773	-1.01	0.632867	-0.31	0.682206
74	633135	Streptococcus phage Abc2	949.905	1047.12	1144.02	0.14	0.408321	0.27	0.315008
73	1124654	Escherichia phage TL-2011b	971.759	531.715	661.212	-0.87	0.749817	-0.56	0.878514
72	50290	Aotine herpesvirus 1	1063.54	649.965	395.44	-0.71	0.890732	-1.43	0.459228
71	548681	Herpesvirales	1085.4	720.099	485.563	-0.59	0.999001	-1.16	0.643372
70	62099	Anomala cuprea entomopoxvirus	1107.25	699.711	558.214	-0.66	0.935713	-0.99	0.772964
69	10335	Human herpesvirus 3	1108.71	682.586	434.064	-0.7	0.899705	-1.35	0.510534
68	132475	Yaba-like disease virus	1120.36	684.216	626.267	-0.71	0.890732	-0.84	0.892976
67	42182	Hepatitis C virus genotype 6	1132.02	534.162	908.592	-1.08	0.577458	-0.32	0.689753
66	54289	Vicia cryptic virus	1139.3	605.927	813.871	-0.91	0.715667	-0.49	0.822211
65	433357	Bidens mottle virus	1155.33	648.334	1074.13	-0.83	0.784465	-0.11	0.538729
64	50292	Cercopithecine herpesvirus 5	1228.17	793.495	551.777	-0.63	0.96281	-1.15	0.650747
63	1477406	Dickeya phage RC-2014	1234	800.835	1104.47	-0.62	0.971854	-0.16	0.573152
62	212035	Acanthamoeba polyphaga mimivirus	1250.03	451.795	444.18	-1.47	0.317546	-1.49	0.422725
61	112023	Streptococcus phage 7201	1298.11	1003.9	445.1	-0.37	0.803892	-1.54	0.393647
60	146015	Elephantid herpesvirus 1	1382.61	931.317	719.149	-0.57	0.982898	-0.94	0.812517
59	1367203	Hemileuca sp. nucleopolyhedrovirus	1471.48	994.928	1037.34	-0.56	0.97385	-0.5	0.830206
58	1208587	Streptococcus phage SPQS1	1481.68	915.007	609.713	-0.7	0.899705	-1.28	0.55777
57	335795	unclassified Lambda-like viruses	1529.76	5366.08	4336.05	1.81	0.00650299	1.5	0.0233752
56	188141	Spring beauty latent virus	1541.41	798.389	1201.95	-0.95	0.682076	-0.36	0.720243
55	12315	Tomato aspermy virus	1589.49	1127.04	1016.19	-0.5	0.919675	-0.65	0.951776
54	305676	Deerpox virus W-1170-84	1719.15	1047.12	642.82	-0.72	0.881773	-1.42	0.465479
53	10484	Campoletis sonorensis ichnovirus	1918.75	1089.53	1439.22	-0.82	0.793197	-0.41	0.758985
52	12104	Encephalomyocarditis virus	1933.32	1754.17	1297.59	-0.14	0.610596	-0.58	0.894727
51	479713	Primula malacoides virus China/Mar2007	2036.76	1184.94	1617.63	-0.78	0.828375	-0.33	0.697331
50	12450	Saccharomyces cerevisiae killer virus M1	2045.5	1159.66	1477.84	-0.82	0.793197	-0.47	0.806278
49	1241371	Abalone herpesvirus Victoria/AUS/2009	2121.26	1406.76	1017.11	-0.59	0.999001	-1.06	0.718586
48	35250	Gallid herpesvirus 3	2127.09	1335.81	1073.21	-0.67	0.926696	-0.99	0.772964
47	33706	Caviid herpesvirus 2	2138.74	1241.21	1684.76	-0.79	0.819546	-0.34	0.704939
46	10506	Paramecium bursaria Chlorella virus 1	2205.76	1396.16	973.886	-0.66	0.935713	-1.18	0.628729
45	1094892	Megavirus chiliensis	2355.82	707.866	459.814	-1.73	0.195509	-2.36	0.0901373
44	32603	Human herpesvirus 6A	2580.19	1867.53	1771.2	-0.47	0.892711	-0.54	0.862352
43	1408895	Dill cryptic virus 1	2588.93	1429.6	2058.13	-0.86	0.758435	-0.33	0.697331
42	1198140	Felixounalikevirus	2666.14	2303.01	603.276	-0.21	0.66733	-2.14	0.141869
41	10685	Bacillus phage SPO1	2699.65	1500.55	2004.79	-0.85	0.767083	-0.43	0.774659
40	1328032	Porcine stool-associated circular virus 3	2779.78	549.657	2838.89	-2.34	0.0469856	0.03	0.448192
39	1328031	Porcine stool-associated circular virus 2	2794.35	626.315	3304.22	-2.16	0.07471	0.24	0.330068
38	251749	Phaeocystis globosa virus	3329.04	2196.18	1593.71	-0.6	0.98995	-1.06	0.718586
37	12336	Clostridium phage c-st	3423.74	2132.57	2758.88	-0.68	0.917688	-0.31	0.682206
36	483537	Alternaria alternata virus 1	3575.26	2055.1	2759.8	-0.8	0.810739	-0.37	0.727938
35	1323525	White clover cryptic virus 2	3996.3	2297.3	3316.18	-0.8	0.810739	-0.27	0.652342
34	180230	Cyprinid herpesvirus 3	4041.47	2721.37	2208.95	-0.57	0.982898	-0.87	0.868683
33	11012	Partitiviridae	4306.62	2585.18	3632.53	-0.74	0.863901	-0.25	0.637613
32	28304	Murid herpesvirus 2	5202.62	3323.22	2044.33	-0.65	0.944739	-1.35	0.510534
31	51368	unclassified dsDNA viruses	5772.28	3928.33	2585.07	-0.56	0.97385	-1.16	0.643372
30	10401	Ictalurid herpesvirus 1	5878.63	4057.18	2989.71	-0.54	0.955766	-0.98	0.780831
29	857312	Brochothrix phage A9	6191.87	4095.51	2612.66	-0.6	0.98995	-1.24	0.585684
28	11103	Hepatitis C virus	6475.96	3063.07	4689.18	-1.08	0.577458	-0.47	0.806278
27	265522	Hyposoter fugitivus ichnovirus	6518.21	4336.91	3493.67	-0.59	0.999001	-0.9	0.844513
26	1323523	Hop trefoil cryptic virus 2	8355.38	4301.84	6096.21	-0.96	0.673773	-0.45	0.790426
25	419435	Glypta fumiferanae ichnovirus	8780.79	5535.71	4522.73	-0.67	0.926696	-0.96	0.796632
24	39640	Cotesia congregata bracovirus	9037.21	5716.76	4500.66	-0.66	0.935713	-1.01	0.7573
23	35278	ssRNA positive-strand viruses, no DNA stage	9550.04	5468.84	8068.81	-0.8	0.810739	-0.24	0.630301
22	1349409	Pandoravirus dulcis	13017.5	8649.34	5999.65	-0.59	0.999001	-1.12	0.673074
21	10742	Enterobacteria phage HK022	14334.5	7346.15	8833.94	-0.96	0.673773	-0.7	0.992694
20	317858	Cyprinid herpesvirus 1	14417.6	9162.3	6351.87	-0.65	0.944739	-1.18	0.628729
19	28883	Caudovirales	15275.7	48506	41132.2	1.67	0.0103932	1.43	0.0281351
18	77775	Salmonella phage FelixO1	17443.6	17720.3	3971.87	0.02	0.489739	-2.13	0.144675
17	70823	Dulcamara mottle virus	19811.1	9794.33	14763.7	-1.02	0.624814	-0.42	0.76681
16	1491393	Jingmen tick virus	22158.1	14640.1	20165.6	-0.6	0.98995	-0.14	0.559258
15	35342	unclassified ssDNA viruses	28309.2	6511.07	30469.1	-2.12	0.082411	0.11	0.400603
14	10699	Siphoviridae	30407.2	106978	89631.5	1.81	0.00650299	1.56	0.0198681
13	576791	Escherichia phage wV8	30606.8	25884.4	6804.33	-0.24	0.692265	-2.17	0.133703
12	1349410	Pandoravirus salinus	32537.2	22085.8	17378.2	-0.56	0.97385	-0.9	0.844513
11	10710	Enterobacteria phage lambda	47624.9	171151	140385	1.85	0.00566348	1.56	0.0198681
10	859651	Rosellinia necatrix partitivirus 2	50815.5	30589.9	42911.7	-0.73	0.872829	-0.24	0.630301
9	35237	dsDNA viruses, no RNA stage	53774.5	34995.3	30060.8	-0.62	0.971854	-0.84	0.892976
8	1511809	Betapartitivirus	57266.7	30394.2	41969.1	-0.91	0.715667	-0.45	0.790426
7	674983	Pleurotus ostreatus virus 1	58672.7	30024.8	42929.1	-0.97	0.665509	-0.45	0.790426
6	10870	Enterobacteria phage M13	61618.5	31306	38138.8	-0.98	0.657286	-0.69	0.984505
5	10325	Macacine herpesvirus 1	76025.9	43872.2	54967.1	-0.79	0.819546	-0.47	0.806278
4	1537164	Porcine stool-associated circular virus 1	89304.2	18282.2	93296.2	-2.29	0.0536427	0.06	0.429981
3	186765	Lambdalikevirus	213018	762106	626627	1.84	0.00586365	1.56	0.0198681
2	10239	Viruses	232351	172354	178335	-0.43	0.856956	-0.38	0.73566
1	374840	Enterobacteria phage phiX174 sensu lato	886902	497534	602152	-0.83	0.784465	-0.56	0.878514
